1 **Multi-modal digital pathology for colorectal cancer diagnosis by high-plex immunofluorescence**  
2 **imaging and traditional histology of the same tissue section**

3 Jia-Ren Lin<sup>1,2,\*</sup>, Yu-An Chen<sup>1,2,\*</sup>, Daniel Campton<sup>3,\*</sup>, Jeremy Cooper<sup>3</sup>, Shannon Coy<sup>1,4</sup>, Clarence  
4 Yapp<sup>1,2</sup>, Juliann B. Tefft<sup>1,2</sup>, Erin McCarty<sup>3</sup>, Keith L. Ligon<sup>4</sup>, Scott J. Rodig<sup>4</sup>, Steven Reese<sup>3</sup>, Tad  
5 George<sup>3</sup>, Sandro Santagata<sup>1,2,4,±</sup>, Peter K. Sorger<sup>1,2,±</sup>

6 \* These authors contributed equally

7 ± These authors contributed equally

8

9 Human Tissue Atlas Center

10 <sup>1</sup>Laboratory of Systems Pharmacology, Department of Systems Biology, Harvard Medical School,  
11 Boston, MA, 02115, USA.

12 <sup>2</sup>Ludwig Center at Harvard, Harvard Medical School, Boston, MA 02115, USA.

13 <sup>3</sup>RareCyte, Inc., 2601 Fourth Ave., Seattle, WA, 98121, USA.

14 <sup>4</sup>Department of Pathology, Brigham and Women's Hospital, Harvard Medical School, Boston, MA  
15 02115, USA.

16 Jia-Ren Lin - 0000-0003-4702-7705

17 Yu-An Chen - 0000-0001-7228-4696

18 Daniel Campton - 0000-0001-6878-3599

19 Jeremy Cooper - 0000-0001-9759-800X

20 Shannon Coy - 0000-0003-0033-9031

21 Clarence Yapp - 0000-0003-1144-5710

22 Juliann Tefft - 0000-0002-8826-665X

23 Erin McCarty - 0000-0002-5827-9353

24 Keith Ligon - 0000-0002-7733-600X

25 Scott J. Rodig - 0000-0003-1761-9769

26 Steven Reese - 0000-0003-0502-0193

27 Tad George - 0000-0002-8123-0240

28 Sandro Santagata - 0000-0002-7528-9668

29 Peter Sorger - 0000-0002-3364-1838

30

31 **Keywords**

32 Precision medicine, machine learning, immune profiling, digital pathology, colorectal cancer, multiplex  
33 microscopy, diagnostics, multiplexed imaging, computational biology, spatial analysis, fluorescence  
34 microscopy, neoplasms, pathology, molecular pathology

35

36 **Pre-publication correspondance**

37 [peter\\_sorger@hms.harvard.edu](mailto:peter_sorger@hms.harvard.edu) cc: [lsp-papers@hms.harvard.edu](mailto:lsp-papers@hms.harvard.edu)

38 Cell Phone: 617-797-4928

39 **ABSTRACT**

40 Precision medicine is critically dependent on better methods for diagnosing and staging disease  
41 and predicting drug response. Histopathology using Hematoxylin and Eosin (H&E) stained tissue - not  
42 genomics – remains the primary diagnostic method in cancer. Recently developed highly-multiplexed  
43 tissue imaging methods promise to enhance research studies and clinical practice with precise, spatially-  
44 resolved, single-cell data. Here we describe the “Orion” platform for collecting and analyzing H&E and  
45 high-plex immunofluorescence (IF) images from the same cells in a whole-slide format suitable for  
46 diagnosis. Using a retrospective cohort of 74 colorectal cancer resections, we show that IF and H&E  
47 images provide human experts and machine learning algorithms with complementary information that  
48 can be used to generate interpretable, multiplexed image-based models predictive of progression-free  
49 survival. Combining models of immune infiltration and tumor-intrinsic features achieves a hazard ratio  
50 of ~0.05, demonstrating the ability of multi-modal Orion imaging to generate high-performance  
51 biomarkers.

52

## 53 INTRODUCTION

54 The microanatomy of fixed and stained tissues has been studied using light microscopy for over  
55 two centuries<sup>1,2</sup>, and immunohistochemistry (IHC) has been in widespread use for 50 years<sup>3</sup>.  
56 Histopathology review of hematoxylin and eosin (H&E) stained tissue sections, complemented by IHC  
57 and exome sequencing, remains the primary approach for diagnosing and managing many diseases,  
58 particularly cancer<sup>4</sup>. More recently, machine learning and artificial intelligence (ML/AI) approaches  
59 have been developed to automatically extract information from H&E images<sup>5</sup>, leading to rapid progress  
60 in computer-assisted diagnosis<sup>6</sup>. However, the H&E and IHC images used in existing digital pathology  
61 systems generally lack the precision and depth of molecular information needed to optimally predict  
62 outcomes, guide the selection of targeted therapies, and enable research into mechanisms of disease<sup>7</sup>.

63 The transition of histopathology from human inspection of physical slides to digital pathology<sup>8</sup> is  
64 occurring concurrently with the introduction of methods for obtaining 10-100-plex imaging data from  
65 fixed tissue sections in a research setting (e.g., MxIF, CyCIF, CODEX, 4i, mIHC, MIBI, IBEX, and  
66 IMC)<sup>9-15</sup>. These high-plex imaging approaches enable deep morphological and molecular analysis of  
67 normal and diseased tissues from humans and animal models<sup>12,16-19</sup> and generate spatially resolved  
68 information that is an ideal complement to other single cell methods, such as scRNA sequencing.  
69 Whereas some imaging methods require frozen samples, those that are compatible with formaldehyde-  
70 fixed and paraffin-embedded (FFPE) specimens – the type of specimens universally acquired for  
71 diagnostic purposes – make it possible to tap into large archives of human biopsy and resection  
72 specimens<sup>20,21</sup>. Many high-plex imaging studies performed to date on human cohorts involve tissue  
73 microarrays (TMAs; arrays of many 0.3 to 1 mm specimens on a single slide) or the small fields of view  
74 characteristic of mass-spectrometry based imaging<sup>9,11</sup>. However, whole-slide imaging is required for  
75 clinical research and for diagnosis, both to achieve sufficient statistical power<sup>22</sup> and as an FDA  
76 requirement<sup>23</sup>.

77 Histopathology review of H&E images is a top-down approach in which human experts draw on  
78 prior knowledge about the abundances and morphologies of cellular and acellular structures prognostic  
79 of disease or predictive of drug response. This prior knowledge, summarized in resources such as the  
80 American Joint Committee on Cancer's staging manual<sup>24</sup>, is based on thousands of clinical research  
81 papers and numerous clinical trials. In contrast, research using highly multiplexed imaging most  
82 commonly involves a bottom-up approach in which cell types are enumerated and an attempt is made to  
83 identify single-cell features or cell neighborhoods associated with disease, for example using spatial  
84 statistics<sup>9,11</sup>. These types of high-plex imaging studies are in their infancy and have not yet been  
85 subjected to rigorous validation in a clinical setting. Thus, a substantial opportunity exists to link  
86 established histological workflows with emerging multiplexed methods in research and diagnostic  
87 settings, thereby allowing deep knowledge of tissue anatomy (from H&E images)<sup>25</sup> to be combined with  
88 precise single cell-data on tumors and their microenvironment.

89 We reasoned that an ideal instrument for bridging top-down and bottom-up approaches would  
90 perform whole-slide imaging (WSI),<sup>26</sup> have sufficient plex and resolution to distinguish tumor, immune  
91 and stromal cell types, and enable reliable and efficient data acquisition with minimal human  
92 intervention. In current practice, combining high-plex immunofluorescence and H&E imaging requires  
93 the use of different tissue sections<sup>27</sup>. However, collection of same-cell multi-modal images would have  
94 the substantial advantage of enabling one-to-one comparison of cell morphologies and molecular  
95 properties. Same-cell H&E and high-plex imaging would also facilitate computational approaches that  
96 combine single-cell molecular profiling with rapid developments in the use of ML/AI to interpret H&E  
97 data<sup>28</sup>.

98 The relative complexity of existing highly multiplexed imaging assays has prevented their  
99 widespread adoption in the clinic; the current standard in clinical research is 5 to 6-plex imaging of  
100 tissue sections using a Perkin Elmer Vectra Polaris<sup>TM</sup> (now Akoya PhenoImager HT<sup>TM</sup>)<sup>29,30</sup>. However, a

101 first-principles analysis suggests that a minimum of 16-20 molecular (IF) channels are required for  
102 tumor profiling (**Extended Data Table 1**): 10-12 to subtype major immune cell types (blue), 2-3 to  
103 detect and subtype tumor cells and states (green), 2-4 to identify relevant tissue structures (yellow), 1-3  
104 to examine tumor cells states or therapeutic mechanisms (grey), plus a nuclear stain to locate cell nuclei  
105 (pink). We reasoned that achieving this or higher plex in a diagnostic or high-throughput research setting  
106 would require acquisition of many fluorescent channels in parallel (one-shot imaging) rather than the  
107 sequential process developed by Gerdes et al.<sup>10</sup> and subsequently extended by our group<sup>15</sup> and others<sup>31</sup>.

108 In this paper, we describe the development of an approach for one-shot, whole-slide, 16 to 18-  
109 channel immunofluorescence (IF) imaging, followed by H&E staining and imaging of the same cells.  
110 Using FFPE specimens from multiple tumor types, we also compare the performance of the “Orion™”  
111 approach and a commercial-grade instrument that implements it, with established IHC and cyclic data  
112 acquisition by CyCIF<sup>32</sup>. We find that joint analysis of H&E and IF same-section Orion images  
113 substantially improves our ability to identify and interpret image features by facilitating the transfer of  
114 anatomical annotation from H&E images to high-plex data (e.g., by distinguishing normal tissue from a  
115 tumor) and also the other way round (e.g., by enabling subtyping of immune cells that are  
116 indistinguishable in H&E data). We show that machine learning (ML) models generated from molecular  
117 analysis of high-plex IF images can be combined with ML of H&E images to aid in feature  
118 identification and interpretation (substantially extending previous data on joint analysis of molecular and  
119 H&E images)<sup>33,34</sup>. In a proof of principle study, we use whole-slide Orion imaging to identify spatial  
120 biomarkers prognostic of tumor progression in independent 30-40-patient human colorectal cancer  
121 (CRC) cohorts (n = 74 patients total). A combination of top-down and bottom-up methods enabled the  
122 generation of biomarker-based models with Hazard Ratios of 0.05 to 0.15. The Orion method is scalable  
123 to the large multi-center cohorts needed to test and validate these proof of principle biomarkers for  
124 eventual use in patient care.

125

## 126 **RESULTS**

### 127 **Constructing and testing the Orion platform.**

128 We investigated multiple approaches for achieving one-shot high-plex IF followed by H&E  
129 imaging of the same cells (i.e., from the same tissue section). Overlap in the excitation and emission  
130 spectra of most widely used fluorophores limits the number of separable fluorescence channels  
131 (typically to five to six) that can be accommodated within the wavelengths useful for antibody labeling  
132 (~350 to 800 nm). This can be overcome using tuned emission and excitation filters and spectral  
133 deconvolution (e.g., of 6 - 10 channels)<sup>35</sup> or by dispersing emitted light using a diffraction grating and  
134 then performing linear unmixing<sup>36,37</sup>. However, unmixing of complex spectra (e.g., from a tissue image  
135 stained with 10 or more fluorophores) has historically resulted in a substantial reduction in sensitivity  
136 and has not been widely implemented. Simultaneous high-plex imaging of tissue specimens therefore  
137 required innovation in the optical platform as well as careful selection of fluorophores.

138 With support from an NCI SBIR grant, a commercial-grade Orion instrument was developed.  
139 The instrument utilizes seven lasers (**Fig. 1a** and **Extended Data Fig. 1**) to illuminate the sample and  
140 collect emitted light with 4X to 40X objective lenses (0.2 NA to 0.95 NA; Orion data in this paper were  
141 collected with a 20X 0.75 NA objective) followed by multiple tunable optical filters<sup>38</sup> that use a non-  
142 orthogonal angle of incidence on thin-film interference filters to shift the emission bandpass<sup>39</sup>. These  
143 filters have 90-95% transmission efficiency and enable collection of 10 - 15 nm bandpass channels with  
144 1 nm center wavelength (CWL) tuning resolution over a wide range of wavelengths (425 to 895 nm).  
145 Narrow bandpass emission channels improve specificity but substantially reduce signal strength; we  
146 overcame this problem by using excitation lasers that are ~10 times brighter than conventional LED  
147 illuminators and by using a sensitive scientific CMOS detector (camera). Raw image files were then  
148 processed computationally to correct for system aberrations such as geometric distortions and camera

149 non-linearity<sup>40</sup>, followed by spectral extraction to remove crosstalk and isolate individual fluorophore  
150 signals (and thus, the antibodies to which they were conjugated). The features of single cells and regions  
151 of tissue were then computed using MCMICRO software<sup>41</sup>.

152 We tested >100 chemical fluorophores from different sources and identified 18 ArgoFluor™  
153 dyes that were compatible with spectral extraction enabled by discrete sampling. Key criteria were: (i)  
154 emission in the 500 - 875 nm range; (ii) high quantum-efficiency; (iii) good photostability; and (iv)  
155 compatibility with each other in high-plex panels (**Extended Data Fig. 1a, Extended Data Table 1 &**  
156 **2**). ArgoFluor dyes were covalently coupled to commercial antibodies directed against lineage markers  
157 of immune (e.g., CD4, CD8, CD68), epithelial (cytokeratin, E-cadherin), and endothelial (CD31) cells  
158 as well as immune checkpoint regulators (PD-1, PD-L1), and cell state markers (Ki-67), to generate  
159 panels suitable for studying the microenvironment and architecture of epithelial tumors and adjacent  
160 normal tissue (**Extended Data Fig. 1b**; the logic underlying Orion panels is show in **Extended Data**  
161 **Fig. 2a**). An accelerated aging test demonstrated excellent reagent stability, estimated to be >5yr at -  
162 20°C storage (**Extended Data Fig. 1c**).

163 Because eosin fluoresces strongly in the 530 - 620 nm range, it proved impractical to perform  
164 H&E staining prior to IF (although alternatives to H&E compatible with IF have been described)<sup>42</sup>.  
165 However, H&E images could be obtained after one or a small number of IF cycles when staining was  
166 performed using an industry-standard Ventana automated slide stainer (or similar machines from other  
167 vendors)<sup>43</sup>. No established standard exists for evaluating the quality of these or other digital H&E  
168 images<sup>44</sup> and comparison across methods is complicated by variation in H&E color intensity among  
169 even clinical histopathology centers<sup>45</sup>. We therefore showed four practicing pathologists images of  
170 tissue sections that had been subjected to one or more IF staining cycles followed by fluorophore  
171 bleaching and asked whether practitioners could distinguish these images from serial section controls  
172 that had been stained with H&E in the standard manner in a clinical facility. The Orion instrument has



173 an integrated brightfield mode, but the H&E images used in this study were also acquired using an  
174 Aperio GT450 microscope (Leica Biosystems), which is a gold standard for diagnostic applications and  
175 facilitated image comparison by human experts.<sup>46</sup> (**Fig. 1a**). When our panel of pathologists compared  
176 control H&E images with those obtained after by Orion, they found them to be indistinguishable and  
177 “diagnostic grade” (**Extended Data Fig. 1f**).

### 178 **Validating high-plex one-Shot fluorescence imaging.**

179 To test the Orion approach, three types of data were collected: (i) whole slide images of both  
180 human tonsil, a standard tissue for antibody qualification, and human lung cancer, a particularly  
181 common cancer type; (ii) images of a TMA that contains 30 different types of normal, non-neoplastic  
182 disease, and tumor samples from 18 tissue types, including brain, breast, colon, kidney, liver, lung,  
183 lymph node, ovary, pancreas, prostate, skin, small intestine, spleen, testis, and tonsil (iii); whole-slide  
184 images of 74 stage I-IV colorectal cancer (CRC) resections obtained from the archives of the Brigham  
185 and Women’s Hospital Pathology Department (these resections were split into two cohorts with 40 and  
186 34 patients each as indicated in **Extended Data Table 3**). We tested and optimized the antibody panel  
187 on tonsil tissue and then applied it successfully to the lung cancer specimen (**Extended Data Fig. 2b**),  
188 TMA (**Extended Data Fig. 2c**), and CRC cohort. We also collected data from a dedicated  
189 autofluorescence channel (445 nm excitation / 485 nm emission, CWL) both to extract natural  
190 fluorescence from the IF channels and improve biomarker signal to noise ratio (SNR), and to provide  
191 information on naturally fluorescent structures such as connective tissues and components of blood  
192 vessels (**Fig. 1b**)<sup>47</sup>. In each case, we performed 18 - 20 plex imaging (16-18 antibody channels,  
193 autofluorescence and a nuclear stain) plus H&E. However, exploratory studies suggest that it should be  
194 possible to add 2-4 additional antibody channels to the method following further optimization of  
195 fluorophores and optical systems (see Methods).

196 In whole slide images of lung, tonsil, and CRC, inspection of extracted images revealed error-  
197 free whole-slide imaging of 1,000 or more adjacent tiles (area up to 35 by 20 mm; **Fig. 1c**)<sup>48</sup> as well as  
198 bright in-focus staining of cellular and cellular substructures within each tile (**Fig. 1d**). To quantify the  
199 effectiveness of spectral extraction, we imaged serial sections of human tonsil tissue each stained with a  
200 single antibody conjugated to a different ArgoFluor and then recorded data in all channels. Under these  
201 conditions, cross talk between adjacent channels averaged ~35%. Spectral extraction reduced this to  
202 <1% (in all but a few cases crosstalk among all pairs of channels was <0.5%; **Fig. 1e**). As a result, when  
203 a tissue section was subjected to multiplexed antibody labeling, we observed correlated signals only for  
204 antibodies that stain targets co-localized on the same types of cells (e.g., co-staining of T-cell  
205 membranes by antibodies against CD3e and CD4 resulted in correlation of the corresponding  
206 fluorescence channels; **Extended Data Fig. 1e**).

207 The staining patterns observed with ArgoFluor-antibody conjugates were similar to those  
208 obtained by conventional IHC performed on the same specimen using the same antibody clones (as  
209 described in Du et al.<sup>49</sup>, one-to-one comparison of IF and IHC is not possible given fundamental  
210 differences in imaging modalities; **Fig. 2a** and **Extended Data Fig. 3a**). We also compared Orion data  
211 to data acquired from a serial tissue section using the well-established cyclic immunofluorescence  
212 (CyCIF) method<sup>15</sup>. We found that the images looked very similar and that fractions of cells scoring  
213 positive for the same markers across the two methods were highly correlated (**Fig. 2b, 2c** shows four  
214 examples with  $\rho = 0.8$  to  $0.9$ ). However, when marker positive cells were less abundant, cell counts were  
215 subject to greater statistical fluctuation from one serial sections to the next, and data from CyCIF and  
216 Orion were less correlated (e.g.  $\rho = 0.55$  for FOXP3 positivity; **Extended Data Fig. 3b**)<sup>49</sup>. Nonetheless,  
217 projections of high dimensional Orion data using t-SNE successfully resolved multiple immune and  
218 tumor cell types (**Fig. 2d** and **Extended Data Fig. 3c**).

219 To test the repeatability of the method, sample processing and imaging of CRC Cohort 1 (n = 40  
220 specimens) was performed at RareCyte, and processing and imaging of Cohort 2 (n = 34 different  
221 specimens) was performed at HMS on a different instrument by different operators; six specimens from  
222 Cohort 1 were imaged at both RareCyte and HMS. Corresponding pairs of images from these six  
223 specimens looked very similar and when cell count data from all 12 images was subjected to  
224 unsupervised clustering, batch effects were not observed (**Extended Data Fig. 4a-c**). Thus, the Orion  
225 method generates results that are qualitatively similar to those obtained using conventional IHC and  
226 quantitative marker intensities are similar between Orion and CyCIF.

227 There are situations in which data from 16-20 fluorescent channels is likely to be insufficient for  
228 identifying cell types of interest. We therefore asked whether multiple rounds of Orion data collection  
229 could be performed on the same cells using a cyclic approach<sup>10,15</sup>. We stained tonsil tissue with 16  
230 ArgoFluor-conjugated antibodies and collected IF data plus autofluorescence and an image of DNA in  
231 the Hoechst channel. Slides were subjected to oxidation with hydrogen peroxide (bleaching), stained  
232 with 13 additional antibodies (this number was based on reagent availability), followed by data  
233 acquisition and processing for H&E and brightfield imaging. We found that crisp, high SNR second-  
234 round images could be obtained using a cyclic approach, yielding a 32-plex Orion image (if same-cell  
235 H&E is included; **Fig. 2e** and **Extended Data Fig. 5a**). We confirmed that the inter-cycle bleaching step  
236 reduced ArgoFluor intensity by >95% and that crosstalk from one cycle to the next was therefore low  
237 (**Extended Data Fig. 5b**). We also found that it was possible to perform multiple rounds of CyCIF after  
238 one round of Orion (**Extended Data Fig. 5c**). Moreover, although many cycles of IF staining and  
239 bleaching reduced H&E image quality, our pathology team judged H&E images collected after two IF  
240 and photobleaching steps to indistinguishable from controls and therefore diagnostic grade (**Extended**  
241 **Data Fig. 5d, e**). We conclude that two-cycle Orion imaging retains IF and H&E image quality, opening  
242 the door to efficient 32-36 plex multi-modal imaging. Exploratory studies suggest room for further

243 development of cyclic and high-plex Orion imaging although more rigorous approaches to scoring H&E  
244 image quality will be required.

### 245 **Integrated analysis of IF and H&E images**

246 When same-cell H&E and IF data were compared, we found that molecular labels obtained from  
247 IF enabled more complete enumeration of lymphocytes than inspection of H&E images by trained  
248 pathologists alone; for example, CD4 and CD8 T cell and B cell lineages look similar by H&E but  
249 clearly distinguishable by IF (arrows in **Fig. 3a**). We also identified many cell types and cell states that  
250 were more readily defined in H&E images based on morphologic features than by immunofluorescence  
251 staining; this included cells such as eosinophils and neutrophils whose morphology is highly  
252 characteristic but which had no lineage markers in our Orion panels, as well as the prophase, metaphase,  
253 anaphase and telophase stages of mitosis (arrows and dashed lines in **Fig. 3b**). A wide variety of  
254 acellular structures such as basement membranes, mucin pools, necrotic domains, etc. were also more  
255 readily scored in H&E than IF images. To begin to quantify the amount of complementary information  
256 in H&E and IF images, we computed the fraction of all cells (as identified by nuclear segmentation) in  
257 the 40-specimen CRC Cohort 1 that could not be assigned a clear identity using IF images; we found  
258 that this varied from 6.5 to 42% of total nuclei (median = 16%) (**Fig. 3c**). We have previously observed  
259 a similar fraction of “unidentifiable” cells following 40-60 plex CyCIF imaging<sup>22</sup> and surmised that  
260 these cells were either negative for all antibody markers included in the panel or had morphologies that  
261 are difficult to segment<sup>50</sup>.

262 To identify cells missing labels in Orion IF data, we used a previously published ML model  
263 trained on H&E images<sup>51</sup> (see Methods for details of this model and its performance). We found that  
264 >50% were predicted to be smooth muscle, stromal fibroblasts or adipocytes (**Fig. 3d**); these predictions  
265 were confirmed by visual inspection of the H&E images by pathologists (**Fig. 3e**). We also examined

266 specimens (e.g., from patient 26, **Fig. 3f** and **Extended Data Fig. 5f**) in which a subset of epithelium  
267 was difficult to identify by IF because it was weakly stained by pan-cytokeratin, E-cadherin, and  
268 immune markers. Inspection of H&E images showed that these weakly-staining cells corresponded to a  
269 serrated adenoma that was distinct from nearby domain of invasive low-grade adenocarcinoma in which  
270 tumor cells stained strongly for pan-cytokeratin and E-cadherin. Differential staining of cytokeratin  
271 isoforms in serrated adenoma and adenocarcinoma has been described previously<sup>52</sup> and we speculate  
272 that in cases such as specimen C26, it reflects clonal heterogeneity. Regardless, low staining intensity  
273 interferes with IF-based cell type calling for a large fraction of the tumor cells in the specimen. From  
274 these findings we conclude that the availability of H&E and IF images of the same set of cells  
275 substantially increases the fraction of cell types and states that can be identified as compared to either  
276 type of data alone. This is particularly true of cell types for which specific molecular markers do not  
277 exist (e.g., stromal fibroblasts) or are not included in the panel (e.g., neutrophils) and markers that are  
278 lost due to tumor sub-clonality (e.g., specific cytokeratin isoforms). Cells that are highly elongated or  
279 have multiple nuclei and are difficult to segment (e.g., muscle cells) are also commonly lost to  
280 computational analysis of IF data but highly distinctive in H&E images.

### 281 **Identifying tumor features predictive of disease progression.**

282       The classification of cancers for diagnostic purposes using American Joint Committee on Cancer  
283 (AJCC/UICC-TNM classification) criteria is based primarily on tumor-intrinsic characteristics (tumor,  
284 lymph node, and metastases, the TNM staging system)<sup>53</sup>. However, the extent and type of immune  
285 infiltration also plays a major role in therapeutic response and survival<sup>54</sup>. In colorectal cancer (CRC) this  
286 has given rise to a clinical test, the Immunoscore<sup>®55</sup>, that quantifies features of the intratumoral and  
287 tumor-proximal immune response to predict CRC progression as measured by progression-free survival  
288 (PFS) or overall survival (OS). The Immunoscore has been validated in multicenter cohort studies and

289 shown to predict time to recurrence in stage III cancers in a Phase 3 clinical trial<sup>56</sup>. The Immunoscore  
290 uses IHC to evaluate the number of CD3 and CD8-positive T cells at the tumor center (CT) and the  
291 invasive margin (IM; for Immunoscore this is defined as a region encompassing 360  $\mu\text{m}$  on either side  
292 of the invasive boundary; in our work we set this to  $\pm 100 \mu\text{m}$  from the boundary)<sup>57,58</sup>. The hazard ratio  
293 (HR; the difference in the rate of progression) between patients with tumors containing few immune  
294 cells in both the CT and the IM (Immunoscore = 0) and patients with tumors containing many cells in  
295 both compartments (Immunoscore = 4) has been reported to be 0.20, (95% CI 0.10–0.38;  $p < 10^{-4}$ ) in a  
296 Cox regression model, with increasing score correlating with longer survival<sup>59</sup>. This is a clinically  
297 significant difference that can be used to inform key treatment decisions: for example, whether or not to  
298 deliver adjuvant therapy (chemotherapy after surgery)<sup>60</sup>. Because chemotherapy is associated with  
299 significant adverse effects, requires infusion or injection in a healthcare setting, and is expensive, it is  
300 highly desirable that patients who are unlikely to experience disease recurrence be spared the burden of  
301 adjuvant therapy.

302 Using Orion data, we developed software scripts to recapitulate key aspects of the Immunoscore  
303 using Progression Free Survival (PFS) as an outcome measure. First, we detected the tumor-stromal  
304 interface and generated masks that matched the criteria for CT and IM ( $\pm 100 \mu\text{m}$  around the tumor  
305 boundary; **Fig. 4a**). CD3 and CD8 positivity in single cells was determined by Gaussian Mixture  
306 Modeling<sup>61</sup> with the median positive fraction for each marker (CD3 or CD8) in each region (CT or IM)  
307 across all 40 CRC cases used as the cutoff for assigning a subscore of 0 or 1; the sum of the four  
308 subscores was used as the final score for Image Feature Model 1 (IFM1; **Fig. 4b**). Parameters for  
309 computing IFM1 such as the size of the invasive margin and the staining threshold for scoring cells  
310 positive and negative were set *a priori* (naively) without any parameter tuning to reduce the risk of over-  
311 training; IFM1 nonetheless yielded a hazard ratio similar to Immunoscore itself on Cohort 1 (HR = 0.14;  
312 95% CI 0.06-0.30;  $p = 7.63 \times 10^{-5}$ ) (**Fig. 4c**). Next, we used the underlying logic of Immunoscore to

313 leverage multiple Orion channels. A total of 13 immune focused markers were used to generate ~15,000  
314 marker combinations (IFMs), each composed of four markers within the CT and IM domains (**Fig. 4d**).  
315 Scores for each CRC case were binarized into high and low scores based on median intensities (again,  
316 without any parameter tuning). When HRs were calculated we found that nearly 600 IFMs exceeded  
317 IFM1 in performance (**Extended Data Fig. 6a-c**). The top 10 IFMs were insignificantly different from  
318 each other, and we chose one (IFM2) for further analysis; it exhibited an HR = 0.05 (95% CI: 0.02-0.10,  
319  $p = 5.5 \times 10^{-6}$ ) (**Fig. 4d** and **4e**) and comprised the fractions of  $\alpha$ -SMA<sup>+</sup> cells in the CT, and CD45<sup>+</sup>, PD-  
320 L1<sup>+</sup>, and CD4<sup>+</sup> cells in the IM. Leave-one-out resampling showed that IFM2 was significantly better  
321 than IFM1 with respect to HR (adjusted p value based on the Benjamini-Hochberg Procedure  $p_{\text{adj}} = 7.3 \times$   
322  $10^{-21}$ ; **Fig. 4f**, **Extended Data Fig. 6d**). To determine whether this result could be generalized to other  
323 specimens, we tested the performance of an IFM2 model created using Cohort 1 on specimens in Cohort  
324 2. Once again, we observed a statistically significant discrimination between progressing and non-  
325 progressing tumors (HR = 0.17; 95% CI: 0.05 to 0.56,  $p = 6.9 \times 10^{-3}$ ; **Fig. 4g**). We conclude that  
326 multiplexed immunoprofiling data extracted from Orion images of CRC resections can be used to  
327 generate high performance prognostic biomarkers.

328         Inspection of images from IFM2 tumors exhibiting slow progression (e.g., patient C34) revealed  
329 high-levels of PD-L1<sup>+</sup> cells (**Fig. 4h**, yellow) adjacent to pan-cytokeratin positive tumor cells (green);  
330 based on overlap of PD-L1<sup>+</sup>, CD68 and CD45 staining we conclude that PD-L1<sup>+</sup> cells are likely myeloid  
331 in origin, as described previously<sup>22</sup>. In C34,  $\alpha$ -SMA stained tumor proximate stromal cells – most likely  
332 fibroblasts – were also well-infiltrated with CD4<sup>+</sup> T cells. By contrast, in a patient with rapid  
333 progression (e.g., patient C09), PD-L1 levels were below the level of detection and CD4<sup>+</sup> cells were less  
334 abundant in the stroma. By H&E, IFM2-high tumors exhibited extensive lymphohistiocytic chronic  
335 inflammation including large lymphoid aggregates and tertiary lymphoid structures (TLS) at the tumor  
336 invasive margin<sup>62</sup>, whereas IFM2-low tumors had relatively few lymphoid aggregates and no TLS (**Fig.**

337 **4h** and **Extended Data Fig. 6e**). Although IFM2-low tumors were also more invasive than IFM2-high  
338 tumors, IFM score was independent of histologic subtype (e.g., conventional vs. mucinous morphology)  
339 and did not correlate with histologic grade (low vs. high grade carcinoma). Thus, IFM2 is likely to  
340 capture activity of the immune microenvironment around the invasive tumor margin as well changes in  
341 tumor-associated fibroblasts. However, deeper phenotyping of more specimens will be required to  
342 identify which molecular features of IFM2 are important for predicting progression. However, we  
343 conclude that Orion data can be used to automate previously described image-based biomarkers based  
344 on single-channel IHC and identify new marker combinations that significantly outperform them (see  
345 limitations sections for further discussion of this point).

#### 346 **Identifying new progression markers.**

347 As an unbiased bottom-up means of identifying new progression models, we used spatial Latent  
348 Dirichlet Allocation (Spatial-LDA)<sup>63</sup>. This approach is a modification of the LDA method developed for  
349 analysis of text<sup>64</sup> that enables probabilistic modeling of spatially distributed data. Spatial LDA is able to  
350 reduce complex assemblies of intermixed entities into distinct component communities (“topics”) while  
351 accounting for uncertainty and missing data; it has performed well on other multiplexed tissue imaging  
352 datasets<sup>65,66</sup>. We separated CRC specimens in Cohort 1 into tumor and adjacent normal tissue using  
353 H&E data and an ML/AI model<sup>51</sup> and then performed spatial LDA at the level of individual IF markers  
354 on cells in the tumor region (**Fig. 5a**). This yielded 12 spatial features (topics) that recurred across the  
355 dataset (the number of topics was optimized by calculating the perplexity; see Methods for details)  
356 (**Extended Data Fig. 7a**). Visual inspection of images by a pathologist confirmed that marker  
357 probabilities matched those computed for different topics and that the frequency distribution of each  
358 topic varied, sometimes substantially, among CRC samples (**Fig. 5b** and **Extended Data Fig. 7b**). The  
359 strongest correlations between topics and PFS for Cohort 1 were found to be -0.52 ( $p < 0.001$ ) for Topic



360 7, comprising pan-cytokeratin and E-cadherin positivity (with little contribution from immune cells) and  
361 +0.57 ( $p < 0.001$ ) for Topic 11, comprising CD20 positivity with minor contributions from CD3, CD4,  
362 and CD45 (**Fig. 5b-5f** and **Extended Data Fig. 7a**). In contrast, topics involving the proliferation  
363 marker Ki-67<sup>+</sup> (Topic 6), PD-L1 positivity (Topic 9), or immune cells markers (CD45<sup>+</sup> or CD45RO<sup>+</sup>;  
364 Topics 3 and 10) exhibited little or no correlation with progression-free survival (**Extended Data Fig.**  
365 **7a**).

366 Given the correlation of Topic 7 with PFS, we constructed a Kaplan-Meier curve for tumors  
367 having a proportion of Topic 7 below the 50<sup>th</sup> percentile versus those above this threshold (including all  
368 cells in the specimen). Imposing this threshold yielded model IFM3 which, on Cohort 1, yielded HR =  
369 0.26 (**Fig. 6a**; CI 95%: 0.11 – 0.63;  $p = 2.98 \times 10^{-4}$ ; note that the value of the threshold was not critical  
370 over the range of 50% – 75%) (**Fig. 6a** and **Extended Data Fig. 8a**). When we tested IFM3 on Cohort 2  
371 we observed even better performance (HR = 0.07; CI 95%: 0.02 - 0.24;  $p = 5.6 \times 10^{-4}$ ; **Fig. 6b**),  
372 suggesting that the model had not been over trained. We conclude that spatial-LDA had discovered – via  
373 unsupervised analysis of high-plex IF data – a tumor-intrinsic feature distinct from immune infiltration  
374 that was significantly associated with poor patient survival.

375 One limitation of this, and many other models built using ML methods such as spatial LDA, is  
376 poor interpretability. In the case of Topic 7, the primary molecular features were pan-cytokeratin and E-  
377 cadherin positivity, but Topic 8 was similar in composition while exhibiting no correlation with PFS ( $r =$   
378 0.01; **Fig. 5c, 5f** and **Extended Data Fig. 7a**). To identify the tumor histomorphology corresponding to  
379 these topics, we transferred labels from IF to the same section H&E images, trained a convolutional  
380 neural network (CNN) on the H&E data, and inspected the highest scoring tumor regions (**Extended**  
381 **Data Fig. 8b**). In the case of Topic 7, these were readily identifiable as regions of poorly  
382 differentiated/high-grade tumor with stromal invasion (**Fig. 6c** and **6d**). In contrast, Topic 8 consisted  
383 predominantly of intestinal mucosa with a largely normal morphology and some areas of well-

384 differentiated tumor (**Fig. 6c** and **Extended Data Fig. 8c**). When we inspected Orion and CyCIF images  
385 of specimens with a high proportion of Topic 7 (e.g., patient C06, **Extended Data Fig. 9**) we found that  
386 the E-cadherin to pan-cytokeratin ratios were low relative to normal mucosa or Topic 8 (expression of  
387 Na,K-ATPase, another protein found on the plasma membranes of colonic epithelial cells, was also  
388 low). These are features of cells undergoing an epithelial-mesenchymal transition (EMT), which is  
389 associated in CRC with progression and metastasis<sup>67</sup>. However, follow-on CyCIF imaging showed that  
390 some features of EMT, such as low proliferation and increased expression of EMT-associated  
391 transcriptional regulators (e.g., ZEB1)<sup>68</sup>, were not generally observed in Topic 7-positive cells: the  
392 proliferation index was high (40-50% Ki67 and PCNA positivity) and staining for ZEB1 was low in  
393 tumor cells (even though ZEB1 was easily detected in nearby stromal cells with mesenchymal  
394 differentiation – compare yellow and white arrows; **Extended Data Fig 9**). Thus, even though the  
395 molecular and morphological features of Topic 7 were consistent with each other, H&E morphology  
396 was more readily interpretable with respect to long established features of CRC progression. It has been  
397 observed previously that interpretability increases confidence in a potential biomarker and substantially  
398 improves its chances of clinical translation<sup>69</sup>.

399         Only about one-third of patients in Cohort 1 scored high for IFM1 and low for IFM3 (the  
400 combination correlated with the longest PFS; **Fig. 6e**), so we reasoned that it would be effective to  
401 combine the two models. Using a composite model (IFM4), we observed excellent discrimination  
402 between progressing and non-progressing CRC patients with HR = 0.12; (95% CI = 0.05 to 0.28; p = 6.7  
403 x 10<sup>-7</sup>) (**Fig. 6f**). Statistically significant results were also obtained from Cohort 2 using a model trained  
404 on Cohort 1 (**Fig. 6g**). This demonstrates that immunological and tumor-intrinsic features of cancers  
405 arising from top-down and bottom-up analysis can be effectively combined to generate prognostic  
406 models with high predictive value. Of note, no parameter tuning (e.g., setting thresholds for positivity)  
407 was involved in the generation of IFMs 1-3 or the highly performative IFM4 hybrid model, reducing the

408 risk of over-training. Experience with Immunoscore shows that parameter tuning using larger cohorts of  
409 patients can further boost performance.

410

## 411 **DISCUSSION**

412 In this paper, we describe an approach to multimodal tissue imaging that combines high-plex,  
413 subcellular resolution IF with conventional H&E imaging of the same cells and show that the approach  
414 can generate performative progression biomarkers of a common type of cancer in a whole-slide format  
415 suitable for clinical translation. The approach required developing a new Orion instrument,  
416 fluorophores, and protocols to enables both one cycle (single-shot) and two cycle high-plex IF data  
417 acquisition while preserving the sample for same-section H&E imaging. We show that such multimodal  
418 tissue imaging is reproducible across performance sites and has substantial benefits for human observers  
419 and machine-learned models. Most obviously, it facilitates the use of extensive historical knowledge  
420 about tissue microanatomy (derived from H&E images) for the interpretation of molecular data derived  
421 from multiplexed molecular imaging. We demonstrate this directly by showing that both human experts  
422 and ML algorithms can exploit H&E images to classify cell types and states that are not readily  
423 identifiable in multiplexed data given inevitable limitations in antibody variety. H&E and  
424 autofluorescence imaging are also effective at characterizing acellular structures that organize tissues at  
425 mesoscales (e.g., the elastic lamina of the vessel wall). At the same time, by overlaying molecular data  
426 on H&E images we show that it is possible to discriminate cell types that have similar morphologies but  
427 different functions. The ability of molecular data to label cell types in H&E images is expected to be  
428 advantageous in supervised learning for ML/AI modeling<sup>7,70</sup> as well as the use of H&E data to analyze  
429 “black box” ML models trained on molecular data. The topic of black box versus interpretable AI is a  
430 major point of discussion in medicine in general<sup>71</sup>, but in the case of pathology it is highly likely that

431 interpretability will improve uptake, facilitate further research, and improve generalizability across  
432 cohorts.

433 The Orion described here instrument currently supports up to 20-plex data simultaneous data  
434 acquisition (including DNA and one or more autofluorescence channels), but we have found that 18-  
435 plex data collection is more robust – hence its use in this paper (see Materials and Methods for a detailed  
436 discussion of this point). It is nonetheless likely that several additional channels can be added to the  
437 approach as we identify fluorophores more optimally matched to available lasers and optical elements.  
438 We show successful 18-plex Orion imaging of 30 types of cancer, diseased tissues, and normal tissues  
439 available as TMA cores or whole slide specimens, demonstrating that the Orion method is widely  
440 applicable. Of course, the combination of antibodies in our colorectal cancer panel is not optimal for  
441 such a wide variety of tissues, but substitution of a few antibodies is expected to yield near-optimal  
442 panels for many cancers of epithelial origin. Moreover, a wide range of commercial antibodies  
443 developed for IHC and IF imaging of tissues are suitable for conjugation with ArgoFluors and use in  
444 Orion panels; the only practical limitation to development of these panels is the time needed to test  
445 conjugated antibodies is various combinations and then validate panel performance and stability.

446 We show that it is possible to perform cyclic data acquisition using the Orion approach as well as  
447 Orion followed by CyCIF, thereby increasing the number of molecular channels dramatically. Cyclic  
448 Orion is particularly well suited to discovery research in which 20-40 plex imaging is increasingly  
449 common<sup>72</sup>. However, H&E staining must be performed after all IF is complete, and we find that H&E  
450 image quality goes down as IF data acquisition extends beyond 2-4 cycles (although additional protocol  
451 optimization may extend this). For diagnostic applications, the imperative for simplicity and reliability is  
452 greater than in a research setting, and our data suggest that performative image-based prognostic tests  
453 may require only a subset of the channels available to Orion (speculatively 8-14 channels) with  
454 attendant reductions in test complexity and cost.

## 455 **Complementarity of same-section Immunofluorescence and H&E imaging**

456 It is not surprising that multiplexed molecular data from IF images add information to H&E  
457 imaging. More surprising are the many cell types and structures that are difficult to identify in  
458 multiplexed images and readily identified in H&E images by histopathologists or the ML algorithms  
459 they train. This includes acellular structures, cell types for which good markers are not readily available,  
460 highly elongated and multi-nucleated cells that are difficult to segment with existing algorithms (e.g.,  
461 muscle cells), and – most remarkably – tumor cells themselves. Many tumor types lack a definitive cell-  
462 type marker, and even when such markers are available, some cells in a tumor are observed to express  
463 these markers poorly or not at all, likely due to sub-clonal heterogeneity<sup>73</sup>. In contrast, pathologists are  
464 skilled at identifying dysplastic and transformed cells in H&E images. Thus, H&E imaging in  
465 combination with ML models is potentially more reliable than IF imaging using molecular markers for  
466 the identification of some types of tumor cells. Conversely, many immune cell types cannot be reliably  
467 differentiated using H&E images, and their presence can also be difficult to discern when cells are  
468 crowded; the use of IF lineage markers provide critical new information in these cases.

469 The complementary strengths of H&E and IF imaging can be exploited by ML/AI algorithms  
470 that are increasingly used to process tissue images in clinical and research settings<sup>70</sup>. For example, we  
471 show that models trained to recognize disease-associated structures in H&E images, which is an area of  
472 intensive development in digital pathology<sup>74</sup>, can improve the analysis and interpretation of multiplexed  
473 IF data. The converse is also true: IF images can be used to automatically label structures in H&E  
474 images (e.g., immune cell types) to assist in supervised learning on these images. This is a significant  
475 development because the labor associated with labeling of images – currently by human experts – is a  
476 major barrier to the development of better ML models. Combined H&E and IF images will be of  
477 immediate use in ML-assisted human-in-the loop environments that represent the state of the art in  
478 image interpretation in a research setting<sup>75</sup>.

## 479 **Using the Orion approach to advance prognostic and predictive biomarkers**

480 A surprising number of pathology workflows involve staining serial sections of a specimen each  
481 with one IHC biomarker on followed by manual inspection of images by histopathology experts. The  
482 Orion approach used in conjunction with open-source software pipelines<sup>41</sup> has the potential to automate  
483 these workflows and also provide new molecular insight into tumor features already known from H&E  
484 data to be prognostic of tumor progression<sup>76</sup>. For example, Immunoscore is a pathology-driven (top-  
485 down) clinical test that uses H&E and IHC data to determine the distribution of specific immune cell  
486 types at the tumor margin and predict outcome (time to recurrence) for patients with CRC. In this paper,  
487 we reproduced the logic of Immunoscore and used automated scripts to show that it is possible to  
488 improve upon it using additional immune markers and a single round of data acquisition (as measured  
489 by Hazard Ratios computed from PFS data; see limitations section below)<sup>77</sup>.

490 In a distinct but complementary bottom-up approach, we use spatially sensitive statistical model  
491 (LDA) of IF data to identify cell neighborhoods significantly associated with CRC progression. The top-  
492 performing feature in this case is tumor-cell intrinsic and is based on the distributions of cytokeratin and  
493 E-cadherin, two epithelial cell markers. Precisely why this is feature is prognostic is unclear from IF  
494 data alone: other features involving similar markers are not predictive. However, inspection of  
495 corresponding H&E data (and training of an ML model) showed that LDA had identified local tumor  
496 morphologies typical of poorly differentiated/high-grade tumor with stromal invasion, increasing our  
497 confidence in the model. Because the features in the tumor-intrinsic model were distinct from and  
498 uncorrelated with the immune markers in Immunoscore, combining the two sets of features significantly  
499 improved the hazard ratio relative to either model used alone. We therefore anticipate that many  
500 opportunities will emerge for joint learning from H&E and IF data using adversarial, reinforcement, and  
501 other types of ML/AI modeling for research purposes, development of novel biomarkers, and analysis of  
502 clinical H&E data at scale<sup>6</sup>. The immediate availability of Orion as a commercial platform and our use

503 of open-source software and OME (Open Microscopy Environment)<sup>78</sup> and MITI (Minimum Information  
504 about Tissue Imaging)<sup>79</sup> compliant data standards makes the approach we describe readily available to  
505 other investigators.

506

## 507 **Limitations**

508 Although the images in this paper represent the largest dataset collected to date using high-plex  
509 whole-slide IF imaging, the number of specimens and the composition of the cohort is insufficient for  
510 IFMs to be considered validated biomarkers or clinical tests<sup>80</sup>. Systematic meta-analysis has identified a  
511 range of factors that negatively impact the reliability and value of prognostic biomarkers<sup>81</sup>, particularly  
512 those based on new technology and multiplexed assays<sup>82</sup>. In the current work, specific limitations  
513 include a relatively small cohort size, the absence of pre-registration<sup>83</sup>, and the acquisition of specimens  
514 from a single institution. The limited number of specimens in the current study, as compared to  
515 conventional practice in histopathology (in which study of 500 cases is not uncommon), makes it  
516 impossible to fully control for all relevant covariates (e.g., depth of invasion, sex, age, race, clinical  
517 stage etc.). Moreover, to enable better detection of image features associated with progression, more  
518 progressors were included in our cohort than would be observed in an unselected population, biasing the  
519 cohort to more serious disease (the two-year disease-free survival for Stage III colon cancer in a 12,834  
520 patient multi-center cohort was reported to be ~80%<sup>84</sup> but it is only ~50% in our cohort). These and  
521 other concerns will be addressable as we gain access to larger and more diverse collections of tissue  
522 blocks from which fresh sections can be cut and multi-modal imaging performed. With all of the  
523 advantages attendant to automated data acquisition and ML-based image analysis we anticipate that it  
524 will be feasible to progress in a few years to validated clinical tests that can be added to colorectal  
525 cancer treatment guidelines<sup>60</sup>, substantially improving opportunities for personalized therapy.

## 526 **ACKNOWLEDGEMENTS**

527 This work was supported by NCI grants U54-CA225088 and U2C-CA233262 (PKS, SS), an NCI SBIR  
528 small business grant to RareCyte and PKS (R41-CA224503), and commercial investment from  
529 RareCyte; image processing software and data science methods were developed with support from the  
530 Bill and Melinda Gates Foundation grant INV-027106, a Team Science Grant from the Gray  
531 Foundation, David Liposarcoma Research Initiative, Emerson Collective, and Ludwig Cancer Research.  
532 SS is supported by the BWH President's Scholars Award. We are grateful to all members of the HMS  
533 Laboratory of Systems Pharmacology (LSP) engaged in tissue imaging (see [https://www.tissue-](https://www.tissue-atlas.org/)  
534 [atlas.org/](https://www.tissue-atlas.org/)), to Joe Victor, and to members of the RareCyte software and hardware development teams.

## 535 **AUTHOR CONTRIBUTIONS**

536 J.R.L., Y.C., D.C., J.C., and E.M performed experiments and imaging. J.R.L., Y.C., D.C., J.C., S.C.,  
537 C.Y., S.R., and T.G. performed data analysis. P.K.S., S.S., T.G., J.R.L., Y.C., and J.B.T. wrote the paper  
538 and all authors reviewed drafts and the final manuscript. J.B.T., J.R.L., and Y.C. prepared the figures.  
539 K.L.L., S.J.R., and S.S. supervised clinical research, and S.R., T.G., S.S., and P.K.S. supervised the  
540 overall research.

## 541 **COMPETING INTERESTS**

542 PKS is a co-founder and member of the BOD of Glencoe Software, a member of the BOD for Applied  
543 Biomath, and a member of the SAB for RareCyte, NanoString, and Montai Health; he holds equity in  
544 Glencoe, Applied Biomath, and RareCyte. PKS is a consultant for Merck and the Sorger lab has  
545 received research funding from Novartis and Merck in the past five years. YC is a consultant for  
546 RareCyte. DC, JC, EM, SR, and TG are employees of RareCyte. The DFCI receives funding for KLL's  
547 research from the following entities: Amgen, Travera, and X4. DFCI and KLL have patents related to  
548 molecular diagnostics of cancer. SJR receives research support from Bristol-Myers-Squibb and



549 KITE/Gilead. SJR is on the Scientific Advisory Board for Immunitas Therapeutics. The other authors  
550 declare no outside interests.

551

## 552 MATERIALS AND METHODS

### 553 Ethics and tissue cohort

554 Our research complies with all relevant ethical regulations and was reviewed and approved by the  
555 Institutional Review Boards (IRB) at Brigham and Women's Hospital (BWH), Harvard Medical School  
556 (HMS), and Dana Farber Cancer Institute (DFCI). Formaldehyde-fixed and paraffin-embedded (FFPE)  
557 tissue samples were used after diagnosis and informed written patient consent under Dana-Farber  
558 Cancer Institute IRB protocol 17-000. The study is compliant with all relevant ethical regulations  
559 regarding research involving human tissue specimens. Two cohorts from same biobank were assembled,  
560 the first with 40 patients with stage II-IV CRC, then the second with 34 patients. Samples were collected  
561 at the time of initial diagnosis.

### 562 Tissue preparation

563 Blocks of FFPE tonsil (AMSBIO, cat# 6022CS) and lung adenocarcinoma (AMSBIO, cat# 28004) and  
564 colorectal adenocarcinoma from the BWH Pathology Department archives were cut at 5  $\mu$ m thickness  
565 using a rotary microtome and the sections were mounted onto Superfrost™ Plus microscope glass slides  
566 (Thermo Fisher, Catalog No.12-550-15). The slides were dried at 37°C overnight and baked at 59°C for  
567 one hour. Slides were stored at 4°C until use.

### 568 Fluorophores for Orion™ imaging

569 The Orion™ instrument is designed to work with an optimized set of fluorophores from RareCyte,  
570 branded as ArgoFluor™ dyes whose emission peaks cover the spectrum from green to far-red  
571 (**Extended Data Table 2**). Although the instrument can also be used with other commercially available  
572 dyes, the ArgoFluor™ dyes have been strategically chosen based on a combination of properties that  
573 include resistance to photobleaching, narrow excitation and emission spectra, and high quantum  
574 efficiency. To date, the company has optimized 18 ArgoFluor dyes, with others in development.

575 **Immunofluorescence antibodies**

576 Antibodies were obtained in carrier-free PBS and conjugated directly to either biotin for  $\alpha$ -SMA,  
577 digoxigenin for pan-cytokeratin or to ArgoFluor™ dyes (RareCyte, Inc.) using amine conjugation  
578 chemistry. After determining labeling efficiency using absorbance spectroscopy, the conjugated  
579 antibodies were diluted in PBS-Antibody Stabilizer (CANDOR Bioscience GmbH, Catalog No. 130050)  
580 to a concentration of 200  $\mu$ g/mL. Antibodies used in immunofluorescence studies are listed in the

581 **Extended Data Table 2.**

582 **Immunofluorescence staining**

583 Slides were de-paraffinized and subjected to antigen retrieval for 5 minutes at 95°C followed by 5  
584 minutes at 107°C, using pH8.5 EZ-AR 2 Elegance buffer (BioGenex, Catalog No. HK547-XAK). To  
585 reduce tissue autofluorescence, slides were placed in a transparent reservoir containing 4.5% H<sub>2</sub>O<sub>2</sub> and  
586 24 mM NaOH in PBS and illuminated with white light for 60 minutes followed by 365 nm light for 30  
587 minutes at room temperature as previously described<sup>15</sup>. Slides were rinsed with surfactant wash buffer  
588 (0.025% Triton X-100 in PBS), placed in a humidified stain tray, and incubated in Image-iT™ FX  
589 Signal Enhancer (Thermo Fisher, Catalog No. I36933) for 15 minutes at room temperature. After rinsing  
590 with surfactant wash buffer, the slides were placed in a humidity tray and stained with the panel of fluor-  
591 and hapten-labeled primary antibodies in PBS-Antibody Stabilizer (CANDOR Bioscience GmbH,  
592 Catalog No.130 050) containing 5% mouse serum and 5% rabbit serum for 2 hours at room temperature.  
593 Slides were then rinsed again with surfactant wash buffer and placed in a humidified stain tray and  
594 incubated with Hoechst 33342 (Thermo Fisher Catalog no. H3570), ArgoFluor™ 845 mouse-anti-DIG,  
595 and ArgoFluor™ 875-conjugated streptavidin in PBS-Antibody Stabilizer containing 10% goat serum  
596 for 30 minutes at room temperature. The slides were then rinsed a final time with surfactant wash buffer  
597 and PBS, coverslipped with ArgoFluor™ Mounting Media (RareCyte, Inc.) and dried overnight.

598 **ArgoFluor™-antibody conjugate stability testing**

599 Antibody accelerated-aging studies were performed to determine ArgoFluor™-antibody conjugation  
600 stability. Reagent stability was measured using the ratio of quantitative metrics obtained with the  
601 accelerated condition (21.6°C) to those obtained with the storage condition (-20°C). Tissue validation  
602 (Orion IF): Single-cell mean fluorescence intensity (MFI) data obtained by imaging FFPE tonsil stained  
603 with the ArgoFluor™ conjugate was gated using a Gaussian mixture model to obtain the percent of  
604 positive cells and S:B values (S and B refer to the MFI of cells with values above (S, Signal) and below  
605 (B, Background) the gated threshold). Fluor stability (Orion IF): Single bead MFI data was obtained by  
606 imaging Ig-capture beads incubated with (S) or without (B) the ArgoFluor™ conjugate. Binding  
607 stability (Flow Cytometry): Intensity data from peripheral blood mononuclear cells (PBMC) stained  
608 with the ArgoFluor conjugated antibody was manually gated to obtain % Positive and S:B values (S and  
609 B refer to the MFI of cells with values above (S) and below (B) the gated threshold).

610 **The Orion method and instrumentation**

611 The Orion instrument was designed with the following performance goals: (1) whole-slide imaging; (2)  
612 rapid single-pass data collection; (3) sub-cellular imaging resolution; (4) sufficient immunoprofiling  
613 depth; (5) bright-field imaging; (6) optical and mechanical stability for accurate image tile stitching; and  
614 (7) compatibility with established image data standards and formats. ArgoFluor™-conjugated antibodies  
615 along with Hoechst dye and tissue autofluorescence were excited by seven laser lines, ranging from 405  
616 to 730 nm (**Extended Data Table 2**). To separate the overlapping emission spectra, images were  
617 captured through a set of nine bandpass filters, which can achieve a tunable narrow band detection  
618 window (10 - 15 nm) throughout the spectrum from 425 nm to 894 nm. For a specific sample, the  
619 detection bands were chosen to optimize color separation, implemented with RareCyte Inc.'s Artemis™  
620 software. Tuning of these filters is based on the well-known fact that the spectrum of a thin-film

621 interference filter shifts toward shorter wavelengths when the angle of incidence shifts away from 0  
622 degrees (orthogonal to the filter surface). The filters were motorized such that any narrow band of 10 -  
623 15 nm can be achieved across the entire fluorescence spectrum. Narrow bandpass emission channels  
624 improve specificity; the resulting lower signal is overcome by using high power excitation lasers, which  
625 yield power at the sample plane ranging from 270 to 600 mW, more than 10 times greater than a typical  
626 fluorescence microscope.

### 627 **Considerations in the development of Orion antibody panels**

628 High-plex imaging exploits the fact that the greater the number of features collected, the greater  
629 the ability to distinguish lineages and states at a single-cell level. The ability of the Orion imaging  
630 platform to discriminate among multiple antibody-fluorophore conjugates is dependent on the degree of  
631 spectral overlap among the fluorophores, the intensity and spectral profile of overlapping  
632 autofluorescence or background signals, and the difference between the most intense staining of highly  
633 expressed proteins and the weakest stain of low abundance proteins. Panel design with the Orion  
634 platform involves assigning biomarkers to channels with the appropriate sensitivity ranges while  
635 managing spectral overlap between markers that are co-localized. Orion imaging technology is  
636 compatible with 20-plex one-shot fluorescence image acquisition (19 antibodies plus Hoechst nuclear  
637 stain) and the necessary research into ArgoFluor is ongoing to achieve this on a routine basis. In the  
638 current work we found that 17-plex panels were easier to achieve at an acceptable SNR given the  
639 properties of tonsil and CRC tissue. We anticipate that, with relatively few additions and substitutions,  
640 the panel we developed for CRC will work well other common tumor types (e.g., lung, breast,  
641 melanoma). In cases in which more precise immunophenotyping is desired, a second cycle Orion panel  
642 of similar complexity is possible. However, it is important to note that both autofluorescence imaging  
643 and the use of ML on H&E images have the potential to generate data additional data on cell types and

644 states – potentially equivalent to 10 or more antibody channels. The prognostic image feature models we  
645 describe in this paper could also be acquired using as few as 8-12 channels. Thus, optimal Orion  
646 imaging and staining strategies in both a research and clinical setting are likely to rely on the use of both  
647 pre-set, high-plex, more difficult to optimize panels and lower-plex, lower-cost, “mix and match”  
648 panels.

#### 649 **One-shot antibody IF imaging with the Orion instrument**

650 Whole slides were scanned using the Orion instrument using acquisition settings optimized for the  
651 specific antibody panels. Briefly, acquisition channel parameters were defined for each biomarker plus  
652 an additional channel dedicated to tissue autofluorescence, and included excitation laser, emission center  
653 wavelength (CWL), and exposure times. The nuclear channel was scanned at low resolution to identify  
654 tissue boundaries, followed by surface mapping at 20X to find the tissue in the z-axis. Whole tissue was  
655 acquired at 20X following the surface map within the specified tissue boundaries by collecting all  
656 channels for a single field of view (FOV) before proceeding to the next partially overlapping FOV. Raw  
657 image files were processed to correct for system aberrations, then signal from individual targets were  
658 isolated to separate channels using the Spectral Matrix obtained with control samples, followed by  
659 stitching of FOVs to generate a continuous open microscopy environment (OME) pyramid TIFF image.

#### 660 **Same Section H&E staining and imaging**

661 After Orion imaging was complete, slides were de-coverslipped by immersion in 1x PBS at 37°C until  
662 the coverslips fell away from the slide. Slides were rinsed in distilled water for 2 minutes, then stained  
663 by a routine regressive H&E protocol using Harris Hematoxylin (Leica, Catalog No. 3801575) and  
664 alcoholic eosin Y (Epredia, Catalog No. 71211). Coverslipping was performed with toluene-based  
665 mounting media (Thermo Scientific, Catalog No. 4112). After drying for 24 hours, slides were scanned  
666 on an Orion system in brightfield mode, using the same scan area used for IF image acquisition. H&E

667 images were also acquired using an Aperio GT450 microscope (Leica Biosystems), and the H&E  
668 images were registered to the IF images using ASHLAR<sup>48</sup> and PALOM software  
669 (<https://github.com/Yu-AnChen/palom>).

### 670 **Pathology annotation of H&E images performed after Orion immunofluorescence imaging**

671 H&E images were annotated by a board-certified anatomic pathologist (SC and SS). The histologic  
672 features of each tissue section were defined and labeled in OMERO PathViewer software on whole slide  
673 images according to morphologic criteria<sup>85</sup> including normal mucosa, hyperplastic mucosa,  
674 adenomatous mucosa (tubular or serrated), invasive adenocarcinoma (tumor), lymphovascular invasion  
675 (LVI), peri-neural invasion (PNI), secondary lymphoid structures/Peyer's patches (SLS), tertiary  
676 lymphoid structures (TLS), lymphoid aggregates (without identifiable germinal center formation),  
677 lymph nodes. Tertiary lymphoid structures were morphologically defined by the presence of a lymphoid  
678 aggregate with germinal center formation and an anatomic distribution and appearance inconsistent with  
679 a secondary lymphoid structure (Peyer's patch or lymph node).

### 680 **CyCIF imaging**

681 Tissue-based cyclic immunofluorescence (CyCIF) was performed as previously described<sup>15</sup> following  
682 the methods available in protocols.io ([dx.doi.org/10.17504/protocols.io.bjiukkew](https://doi.org/10.17504/protocols.io.bjiukkew)). Data from specimens  
683 C1-C17 was acquired as previously reported<sup>22</sup> and computed cell counts were compared in this study  
684 with cell counts derived from Orion images of adjacent sections from the same specimens. A BOND RX  
685 Automated Slide Stainer was used to bake FFPE slides at 60°C for 30 minutes. Dewaxing was  
686 performed using Bond Dewax solution at 72°C, and antigen retrieval was performed using BOND  
687 Epitope Retrieval Solution 1 (Leica Biosystems) at 100°C for 20 minutes. Slides then underwent  
688 multiple cycles of antibody incubation, imaging, and fluorophore inactivation to perform the CyCIF  
689 process. All antibodies were incubated overnight at 4°C in the dark. Slides were stained with Hoechst

690 33342 for 10 minutes at room temperature in the dark following antibody incubation in every cycle.  
691 Coverslips were wet-mounted using 200 $\mu$ L of 10% Glycerol in PBS prior to imaging. Images were  
692 taken using a 20X objective (0.75 NA) on a CyteFinder™ slide scanning fluorescence instrument  
693 (RareCyte Inc. Seattle WA). Fluorophores were inactivated by incubating slides in a 4.5% H<sub>2</sub>O<sub>2</sub>, 24mM  
694 NaOH in PBS solution and placing under an LED light source for 1 hr. For CyCIF after Orion imaging,  
695 slides were immersed in 1x PBS at 37°C until the coverslips fell away from the slide. The standard  
696 CyCIF method was subsequently performed on these slides.

### 697 **Immunohistochemistry**

698 FFPE sections were de-paraffinized, dehydrated, and endogenous peroxidase activity was blocked.  
699 Antigen retrieval was performed for 20 minutes at 100°C, at pH9, using BOND Epitope Retrieval  
700 Solution 2 (Leica Biosystems). Detection was achieved using a Bond Polymer Refine Detection® DAB  
701 chromogen kit and counterstained with hematoxylin. Slides were scanned using a RareCyte CyteFinder  
702 instrument. Primary antibodies used in immunohistochemistry are listed in **Extended Data Table 2**.

### 703 **Orion image processing data quantification**

704 *Image stitching and segmentation.* Image data processing was performed using MCMICRO modules<sup>41</sup>.  
705 Briefly, stitched, registered, illumination and geometric distortion corrected images were generated by  
706 the Orion platform. Single-cell segmentation was performed with UNMICST2 and cell masks were  
707 generated by 5-pixel dilation of the nucleus masks. Mean intensity of each channel and morphological  
708 features were quantified for each cell masks. Image and data analysis was performed using customized  
709 scripts in Python, ImageJ and MATLAB. All code is available on GitHub  
710 (<https://github.com/labsyspharm/orion-crc>).

711

### 712 **Analysis of channel crosstalk**



713 *Single-plex tonsil images.* Tonsil FFPE sections stained with single antibody-ArgoFluor underwent  
714 standard acquisition and extraction process using the Orion instrument. The pixel intensities of all 18  
715 channels from 17 samples were used to quantify bleed through of a given antibody-ArgoFluor complex  
716 to the other channels before and after spectral extraction.

717 *18-plex tonsil image.* Pearson's correlation coefficients between all channel pairs were computed using  
718 pixel intensities in the 18-plex tonsil image before and after spectral extraction.

719

## 720 **Computational analysis of Orion images and derivation of image feature models**

721 *IFM computation from Orion data.* IFM1 was designed to replicate the logic of the Immunoscore  
722 method and was calculated in a semi-automated manner using Orion data. In brief, quantitative data of  
723 tumor and immune markers (pan-cytokeratin, CD3e, and CD8a) were gated for high and low cells using  
724 a Gaussian Mixture Model (GMM) and confirmed by inspection. After gating, the pan-cytokeratin<sup>+</sup> cells  
725 were then used to generate tumor masks using a K-Nearest Neighbor (KNN) model (kernel size = 25  
726 cells). The tumor margins were derived from tumor masks by expanding 100 microns in either direction  
727 from the point of stroma-tumor contact. The CD3<sup>+</sup> and CD8<sup>+</sup> fraction, defined as marker positive cells  
728 divided by the total of all successfully segmented cells of all types in either the tumor center (TC) or  
729 invasive margin (IM). Tumor and margins were enumerated independently in each sample. The median  
730 values of all samples were used as a cutoff to defined a subscore as follows: below the median scored as  
731 0 and above the median scored as 1. The final IFM1 value was calculated by adding together the  
732 subscores for CD3 and CD8 positive cells in the TC and IM regions (see **Fig. 4b** for a flow diagram).  
733 The IFM1 score therefore ranged from 0 (CD3<sup>+</sup> and CD8<sup>+</sup> low in both regions) to 4 (CD3<sup>+</sup> and CD8<sup>+</sup>  
734 high in both regions). Similar logic was used to generated other combinations of IFMs. 13 selected  
735 immune markers (CD3, CD8, CD45, CD45RO, CD68, CD163, CD4, CD20,  $\alpha$ -SMA, FOXP3, PD-1,  
736 PD-L1) were gated as described above, and 26 parameters (each marker in the tumor or tumor/stromal

737 interface regions) were generated. The complete combination of 4 out of 26 parameters was tested against  
738 PFS days for Hazard Ratio (HR). IFM2 was the 3<sup>rd</sup> best IFM among those combinations, excluding the  
739 1<sup>st</sup> and 2<sup>nd</sup> best combinations which had some of the same markers as IFM1 (i.e., CD3 and CD8); the  
740 difference in performance between the top performing models was insignificant.

741 *Leave-one-out (LOO) test and bootstrapping analysis for IFM2.* In the LOO test, the ranks of IFM1 and  
742 IFM2 were recalculated with the 40 set of samples ( $n = 39$ ); each set left out one sample from the  
743 original cohort. The collections of ranks from IFM1 and IFM2 were then tested with pairwise t-test. For  
744 bootstrapping, the 500 set of randomly selected samples were used to recalculate the hazard ratios of  
745 IFM1 and IFM2 as described above. The collections of hazard ratios from IFM1 and IFM2 were then  
746 tested with the pairwise t-test. To adjust for multiple hypotheses, the Benjamini-Hochberg Procedure  
747 was used with  $FDR = 0.1$ .

748 *Latent Dirichlet Allocation for IFM3 and IFM4.* Latent Dirichlet Allocation (LDA) was used to compute  
749 spatial neighborhoods as described<sup>22</sup>. First, each sample was divided into “grids” of 200 microns<sup>2</sup>, and  
750 marker frequency was calculated in each grid. The summarized probabilities of all samples were then  
751 used to generate the LDA model with 12 topics using collapsed Gibbs sampling in MATLAB. The  
752 optimal topic number was determined via varying numbers (between 8 to 16) of topics and evaluating  
753 the goodness-of-fit by calculating the perplexity of a held-out set. After fitting a global LDA model, the  
754 individual samples were then applied with the same models to assign topics at the single-cell level.

### 755

### 756 **Convolutional Neural Network to identify IFM3 in H&E images**

757 A publicly available DenseNet161 model (<https://doi.org/10.1101/2021.12.23.474029>) trained with the  
758 100K CRC H&E dataset (<https://doi.org/10.5281/zenodo.1214456>) was used to classify the post-Orion  
759 H&E image patches (112  $\mu\text{m}^2$ ) for all the CRC samples. WSI patch prediction was performed with  
760 TIAToolbox v1.1.0 (<https://doi.org/10.1101/2021.12.23.474029>) on a Windows PC with Nvidia

761 GeForce GTX 1080 graphics card and using batch size = 32. Model performance was reported as  $F_1 =$   
762 0.992. As described in the training dataset, there are 9 output classes: adipose (ADI), background  
763 (BACK), debris (DEB), lymphocytes (LYM), mucus (MUC), smooth muscle (MUS), normal colon  
764 mucosa (NORM), cancer-associated stroma (STR), colorectal adenocarcinoma epithelium (TUM).  
765 Scripts for reproducing the inference results can be found at <https://github.com/labsyspharm/orion-crc>.  
766 The transfer learning of a GoogLeNet model was done as follows. First, the patch images of 224 x 224  
767 pixels<sup>2</sup> were generated from post-Orion H&E images, and the LDA topics were assigned to each patch  
768 using Orion data. To exclude low confidence training data, only patches with more than 20 cells and the  
769 percentage of the dominant topic over 60% were used. The selected patches were then separated into  
770 training, validation, and test sets as the ratio 0.6:0.2:0.2. The training was done with MATLAB (version  
771 2019b) and the results are shown in **Extended Data Fig. 8b**. Scripts and training data are available at  
772 <https://github.com/labsyspharm/orion-crc>. Training parameters are listed at **Extended Data Table 5**.

773

#### 774 **Outcome analysis**

775 For all survival analyses, we used a combined survival endpoint of progression-free survival that  
776 encompasses both time to disease recurrence for patients who underwent curative-intent resections  
777 (disease-free survival; PFS) and time to progression for patients with measurable disease (progression-  
778 free survival; PFS); we used PFS in this paper because it is more familiar. Outcome analysis was  
779 performed using Kaplan-Meier estimation and log-rank test utilizing the MatSurv function in  
780 MATLAB<sup>86</sup>. Cutoffs for IFM1, IFM2, and IFM3 were selected at the median value of the entire cohort,  
781 and cutoff for IFM4 were selected based on IFM1 & IFM3 as described. Hazard ratios and confidence  
782 intervals were calculated with the log-rank approach:  $HR = (O_a/E_a)/(O_b/E_b)$ , where  $O_a$  &  $O_b$  are the  
783 observed events in each group and  $E_a$  &  $E_b$  are the number of expected events<sup>78</sup>.

784 **DATA AVAILABILITY (AT PUBLICATION – SEE INFORMATION FOR REVIEWERS**  
785 **ABOVE)**

786 Data used in the preparation of this manuscript are detailed in the Source Data file provided with the  
787 manuscript. All image and derived data are available without restriction via the NCI Human Tumor  
788 Atlas Network (HTAN) Portal (<https://humantumoratlas.org/explore>) in accordance with NCI Moonshot  
789 Policies. HTAN participant ID is listed in **Extended Data Table 3**. Access to processed and  
790 unprocessed data are available via an index page on GitHub that has been archived on Zenodo  
791 (<https://zenodo.org/>) - <https://doi.org/10.5281/zenodo.7637655>.

792 **CODE AVAILABILITY**

793 All code is available under an MIT open-source license via an index page on GitHub that has been  
794 archived on Zenodo (<https://zenodo.org/>) - <https://doi.org/10.5281/zenodo.7637655>.

795

796

797 **REFERENCES**

- 798 1. Bock, O. A history of the development of histology up to the end of the nineteenth century.  
799 *Research* (2015).
- 800 2. Paget, S. THE DISTRIBUTION OF SECONDARY GROWTHS IN CANCER OF THE BREAST.  
801 *The Lancet* **133**, 571–573 (1889).
- 802 3. Coons, A. H., Creech, H. J. & Jones, R. N. Immunological Properties of an Antibody Containing a  
803 Fluorescent Group. *Proceedings of the Society for Experimental Biology and Medicine* **47**, 200–202  
804 (1941).
- 805 4. *Robbins & Cotran pathologic basis of disease*. (Elsevier, 2021).
- 806 5. Demir, C. & Yener, B. Automated cancer diagnosis based on histopathological images: A  
807 systematic survey. (2004).
- 808 6. Cui, M. & Zhang, D. Y. Artificial intelligence and computational pathology. *Lab Invest* **101**, 412–  
809 422 (2021).
- 810 7. Wharton, K. A. *et al.* Tissue Multiplex Analyte Detection in Anatomic Pathology – Pathways to  
811 Clinical Implementation. *Frontiers in Molecular Biosciences* **8**, (2021).
- 812 8. Abels, E. *et al.* Computational pathology definitions, best practices, and recommendations for  
813 regulatory guidance: a white paper from the Digital Pathology Association. *J. Pathol.* **249**, 286–294  
814 (2019).
- 815 9. Angelo, M. *et al.* Multiplexed ion beam imaging of human breast tumors. *Nat. Med.* **20**, 436–442  
816 (2014).
- 817 10. Gerdes, M. J. *et al.* Highly multiplexed single-cell analysis of formalin-fixed, paraffin-embedded  
818 cancer tissue. *Proc. Natl. Acad. Sci. U.S.A.* **110**, 11982–11987 (2013).
- 819 11. Giesen, C. *et al.* Highly multiplexed imaging of tumor tissues with subcellular resolution by mass  
820 cytometry. *Nat. Methods* **11**, 417–422 (2014).

- 821 12. Goltsev, Y. *et al.* Deep Profiling of Mouse Splenic Architecture with CODEX Multiplexed Imaging.  
822 *Cell* **174**, 968-981.e15 (2018).
- 823 13. Gut, G., Herrmann, M. D. & Pelkmans, L. Multiplexed protein maps link subcellular organization to  
824 cellular states. *Science* **361**, (2018).
- 825 14. Tsujikawa, T. *et al.* Quantitative Multiplex Immunohistochemistry Reveals Myeloid-Inflamed  
826 Tumor-Immune Complexity Associated with Poor Prognosis. *Cell Rep* **19**, 203–217 (2017).
- 827 15. Lin, J.-R. *et al.* Highly multiplexed immunofluorescence imaging of human tissues and tumors using  
828 t-CyCIF and conventional optical microscopes. *eLife* **7**, (2018).
- 829 16. Färkkilä, A. *et al.* Immunogenomic profiling determines responses to combined PARP and PD-1  
830 inhibition in ovarian cancer. *Nat Commun* **11**, 1459 (2020).
- 831 17. Launonen, I.-M. *et al.* Single-cell tumor-immune microenvironment of BRCA1/2 mutated high-  
832 grade serous ovarian cancer. *Nat Commun* **13**, 835 (2022).
- 833 18. Schürch, C. M. *et al.* Coordinated Cellular Neighborhoods Orchestrate Antitumoral Immunity at the  
834 Colorectal Cancer Invasive Front. *Cell* **182**, 1341-1359.e19 (2020).
- 835 19. Wagner, J. *et al.* A Single-Cell Atlas of the Tumor and Immune Ecosystem of Human Breast  
836 Cancer. *Cell* **177**, 1330-1345.e18 (2019).
- 837 20. Burger, M. L. *et al.* Antigen dominance hierarchies shape TCF1+ progenitor CD8 T cell phenotypes  
838 in tumors. *Cell* **184**, 4996-5014.e26 (2021).
- 839 21. Gaglia, G. *et al.* Temporal and spatial topography of cell proliferation in cancer. *Nat Cell Biol* **24**,  
840 316–326 (2022).
- 841 22. Lin, J.-R. *et al.* Multiplexed 3D atlas of state transitions and immune interaction in colorectal cancer.  
842 *Cell* **186**, 363-381.e19 (2023).
- 843 23. Health, C. for D. and R. Technical Performance Assessment of Digital Pathology Whole Slide  
844 Imaging Devices. *U.S. Food and Drug Administration* <http://www.fda.gov/regulatory->

- 845 information/search-fda-guidance-documents/technical-performance-assessment-digital-pathology-  
846 whole-slide-imaging-devices (2019).
- 847 24. Weiser, M. R. AJCC 8th Edition: Colorectal Cancer. *Ann Surg Oncol* **25**, 1454–1455 (2018).
- 848 25. Lahiani, A., Klaiman, E. & Grimm, O. Enabling Histopathological Annotations on  
849 Immunofluorescent Images through Virtualization of Hematoxylin and Eosin. *J Pathol Inform* **9**, 1  
850 (2018).
- 851 26. Ghaznavi, F., Evans, A., Madabhushi, A. & Feldman, M. Digital imaging in pathology: whole-slide  
852 imaging and beyond. *Annu Rev Pathol* **8**, 331–359 (2013).
- 853 27. Fischer, A. H., Jacobson, K. A., Rose, J. & Zeller, R. Hematoxylin and eosin staining of tissue and  
854 cell sections. *CSH Protoc* **2008**, pdb.prot4986 (2008).
- 855 28. de Haan, K. *et al.* Deep learning-based transformation of H&E stained tissues into special stains.  
856 *Nat Commun* **12**, 4884 (2021).
- 857 29. O’Meara, T. A. *et al.* Abstract P1-04-05: Multiplexed immunofluorescence staining of intra-tumoral  
858 immune cell populations and associations with immunohistochemical, clinical, and pathologic  
859 variables in breast cancer. *Cancer Research* **82**, P1-04–05 (2022).
- 860 30. Berry, S. *et al.* Analysis of multispectral imaging with the AstroPath platform informs efficacy of  
861 PD-1 blockade. *Science* **372**, eaba2609 (2021).
- 862 31. Jones, J. A. *et al.* Oligonucleotide conjugated antibody strategies for cyclic immunostaining. *Sci Rep*  
863 **11**, 23844 (2021).
- 864 32. Lee, S. *et al.* Novel charged sodium and calcium channel inhibitor active against neurogenic  
865 inflammation. *Elife* **8**, e48118 (2019).
- 866 33. Burlingame, E. A., Margolin, A. A., Gray, J. W. & Chang, Y. H. SHIFT: speedy histopathological-  
867 to-immunofluorescent translation of whole slide images using conditional generative adversarial  
868 networks. *Proc SPIE Int Soc Opt Eng* **10581**, 1058105 (2018).

- 869 34. Prichard, J. W. *et al.* TissueCypher<sup>TM</sup>: A systems biology approach to anatomic pathology. *J Pathol*  
870 *Inform* **6**, 48 (2015).
- 871 35. McRae, T. D., Oleksyn, D., Miller, J. & Gao, Y.-R. Robust blind spectral unmixing for fluorescence  
872 microscopy using unsupervised learning. *PLOS ONE* **14**, e0225410 (2019).
- 873 36. Garini, Y., Young, I. T. & McNamara, G. Spectral imaging: principles and applications. *Cytometry*  
874 *A* **69**, 735–747 (2006).
- 875 37. Zimmermann, T. Spectral imaging and linear unmixing in light microscopy. *Adv Biochem Eng*  
876 *Biotechnol* **95**, 245–265 (2005).
- 877 38. Favreau, P. *et al.* Thin-film tunable filters for hyperspectral fluorescence microscopy. *J Biomed Opt*  
878 **19**, 011017 (2014).
- 879 39. Anderson, N., Beeson, R. & Erdogan, T. Angle-Tuned Thin-Film Interference Filters for Spectral  
880 Imaging. *Optics and Photonics News* **13**, 1–2 (2011).
- 881 40. Zeng, Z. *et al.* Computational methods in super-resolution microscopy. *Frontiers Inf Technol*  
882 *Electronic Eng* **18**, 1222–1235 (2017).
- 883 41. Schapiro, D. *et al.* MCMICRO: a scalable, modular image-processing pipeline for multiplexed tissue  
884 imaging. *Nat Methods* **19**, 311–315 (2022).
- 885 42. McLane, M. *et al.* 46 A novel H&E-like staining method compatible with multiplexed IF on the  
886 same tissue section for integrated translational workflows. *J Immunother Cancer* **8**, (2020).
- 887 43. Hassell, L. A., Glass, C. F., Yip, C. & Eneff, P. A. The combined positive impact of Lean  
888 methodology and Ventana Symphony autostainer on histology lab workflow. *BMC Clin Pathol* **10**, 2  
889 (2010).
- 890 44. Chlipala, E. *et al.* Optical density-based image analysis method for the evaluation of hematoxylin  
891 and eosin staining precision. *Journal of Histotechnology* **43**, 29–37 (2020).



- 892 45. Tellez, D. *et al.* Quantifying the effects of data augmentation and stain color normalization in  
893 convolutional neural networks for computational pathology. *Medical Image Analysis* **58**, 101544  
894 (2019).
- 895 46. Babawale, M. *et al.* Verification and Validation of Digital Pathology (Whole Slide Imaging) for  
896 Primary Histopathological Diagnosis: All Wales Experience. *J Pathol Inform* **12**, 4 (2021).
- 897 47. STEINER, K. Fluorescence Microscopy of Normal and Pathologic Keratin. *Archives of*  
898 *Dermatology* **82**, 352–361 (1960).
- 899 48. Muhlich, J. L. *et al.* Stitching and registering highly multiplexed whole slide images of tissues and  
900 tumors using ASHLAR. *Bioinformatics* btac544 (2022) doi:10.1093/bioinformatics/btac544.
- 901 49. Du, Z. *et al.* Qualifying antibodies for image-based immune profiling and multiplexed tissue  
902 imaging. *Nat Protoc* **14**, 2900–2930 (2019).
- 903 50. Yapp, C. *et al.* UnMICST: Deep learning with real augmentation for robust segmentation of highly  
904 multiplexed images of human tissues. *Commun Biol* **5**, 1263 (2022).
- 905 51. Kather, J. N. *et al.* Predicting survival from colorectal cancer histology slides using deep learning: A  
906 retrospective multicenter study. *PLOS Medicine* **16**, e1002730 (2019).
- 907 52. Tatsumi, N. *et al.* Expression of Cytokeratins 7 and 20 in Serrated Adenoma and Related Diseases.  
908 *Dig Dis Sci* **50**, 1741–1746 (2005).
- 909 53. Amin, M. B. *et al.* The Eighth Edition AJCC Cancer Staging Manual: Continuing to build a bridge  
910 from a population-based to a more ‘personalized’ approach to cancer staging. *CA Cancer J Clin* **67**,  
911 93–99 (2017).
- 912 54. Paijens, S. T., Vledder, A., de Bruyn, M. & Nijman, H. W. Tumor-infiltrating lymphocytes in the  
913 immunotherapy era. *Cell Mol Immunol* **18**, 842–859 (2021).
- 914 55. Galon, J. *et al.* Towards the introduction of the ‘Immunoscore’ in the classification of malignant  
915 tumours. *The Journal of Pathology* **232**, 199–209 (2014).

- 916 56. Pagès, F., Taieb, J., Laurent-Puig, P. & Galon, J. The consensus Immunoscore in phase 3 clinical  
917 trials; potential impact on patient management decisions. *Oncoimmunology* **9**, 1812221.
- 918 57. Angell, H. K., Bruni, D., Barrett, J. C., Herbst, R. & Galon, J. The Immunoscore: Colon Cancer and  
919 Beyond. *Clin Cancer Res* **26**, 332–339 (2020).
- 920 58. Galon, J. *et al.* Type, Density, and Location of Immune Cells Within Human Colorectal Tumors  
921 Predict Clinical Outcome. *Science* **313**, 1960–1964 (2006).
- 922 59. Pagès, F. *et al.* International validation of the consensus Immunoscore for the classification of colon  
923 cancer: a prognostic and accuracy study. *The Lancet* **391**, 2128–2139 (2018).
- 924 60. Argilés, G. *et al.* Localised colon cancer: ESMO Clinical Practice Guidelines for diagnosis,  
925 treatment and follow-up†. *Annals of Oncology* **31**, 1291–1305 (2020).
- 926 61. Pan, K., Kokaram, A., Hillebrand, J. & Ramaswami, M. Gaussian mixtures for intensity modeling of  
927 spots in microscopy. in 121–124 (2010). doi:10.1109/ISBI.2010.5490398.
- 928 62. Graham, D. M. & Appelman, H. D. Crohn’s-like lymphoid reaction and colorectal carcinoma: a  
929 potential histologic prognosticator. *Mod Pathol* **3**, 332–335 (1990).
- 930 63. Chen, Z., Soifer, I., Hilton, H., Keren, L. & Jovic, V. Modeling Multiplexed Images with Spatial-  
931 LDA Reveals Novel Tissue Microenvironments. *J Comput Biol* **27**, 1204–1218 (2020).
- 932 64. Blei, D. M., Ng, A. Y. & Jordan, M. I. Latent dirichlet allocation. *J. Mach. Learn. Res.* **3**, 993–1022  
933 (2003).
- 934 65. Nirmal, A. J. *et al.* The spatial landscape of progression and immunoediting in primary melanoma at  
935 single cell resolution. *Cancer Discov* candisc.1357.2021 (2022) doi:10.1158/2159-8290.CD-21-  
936 1357.
- 937 66. Kuswanto, W., Nolan, G. & Lu, G. Highly multiplexed spatial profiling with CODEX: bioinformatic  
938 analysis and application in human disease. *Semin Immunopathol* 1–13 (2022) doi:10.1007/s00281-  
939 022-00974-0.

- 940 67. Cao, H., Xu, E., Liu, H., Wan, L. & Lai, M. Epithelial-mesenchymal transition in colorectal cancer  
941 metastasis: A system review. *Pathol Res Pract* **211**, 557–569 (2015).
- 942 68. Zhang, P., Sun, Y. & Ma, L. ZEB1: at the crossroads of epithelial-mesenchymal transition,  
943 metastasis and therapy resistance. *Cell Cycle* **14**, 481–487 (2015).
- 944 69. Ludwig, J. A. & Weinstein, J. N. Biomarkers in cancer staging, prognosis and treatment selection.  
945 *Nat Rev Cancer* **5**, 845–856 (2005).
- 946 70. Granter, S. R., Beck, A. H. & Papke, D. J. AlphaGo, Deep Learning, and the Future of the Human  
947 Microscopist. *Arch. Pathol. Lab. Med.* **141**, 619–621 (2017).
- 948 71. Wang, F., Kaushal, R. & Khullar, D. Should Health Care Demand Interpretable Artificial  
949 Intelligence or Accept ‘Black Box’ Medicine? *Ann Intern Med* **172**, 59–60 (2020).
- 950 72. Tan, W. C. C. *et al.* Overview of multiplex immunohistochemistry/immunofluorescence techniques  
951 in the era of cancer immunotherapy. *Cancer Commun (Lond)* **40**, 135–153 (2020).
- 952 73. Becker, A. P., Sells, B. E., Haque, S. J. & Chakravarti, A. Tumor Heterogeneity in Glioblastomas:  
953 From Light Microscopy to Molecular Pathology. *Cancers (Basel)* **13**, 761 (2021).
- 954 74. Bhinder, B., Gilvary, C., Madhukar, N. S. & Elemento, O. Artificial Intelligence in Cancer Research  
955 and Precision Medicine. *Cancer Discov* **11**, 900–915 (2021).
- 956 75. Evans, T. *et al.* The explainability paradox: Challenges for xAI in digital pathology. *Future*  
957 *Generation Computer Systems* **133**, 281–296 (2022).
- 958 76. Savadjiev, P. *et al.* Image-based biomarkers for solid tumor quantification. *Eur Radiol* **29**, 5431–  
959 5440 (2019).
- 960 77. Bruni, D., Angell, H. K. & Galon, J. The immune contexture and Immunoscore in cancer prognosis  
961 and therapeutic efficacy. *Nat Rev Cancer* **20**, 662–680 (2020).
- 962 78. Swedlow, J. R., Goldberg, I., Brauner, E. & Sorger, P. K. Informatics and quantitative analysis in  
963 biological imaging. *Science* **300**, 100–102 (2003).

- 964 79. Schapiro, D. *et al.* MITI minimum information guidelines for highly multiplexed tissue images. *Nat*  
965 *Methods* **19**, 262–267 (2022).
- 966 80. Research, C. for D. E. and. Considerations for Use of Histopathology and Its Associated  
967 Methodologies to Support Biomarker Qualification Guidance for Industry. *U.S. Food and Drug*  
968 *Administration* [https://www.fda.gov/regulatory-information/search-fda-guidance-](https://www.fda.gov/regulatory-information/search-fda-guidance-documents/considerations-use-histopathology-and-its-associated-methodologies-support-biomarker-qualification)  
969 [documents/considerations-use-histopathology-and-its-associated-methodologies-support-biomarker-](https://www.fda.gov/regulatory-information/search-fda-guidance-documents/considerations-use-histopathology-and-its-associated-methodologies-support-biomarker-qualification)  
970 [qualification](https://www.fda.gov/regulatory-information/search-fda-guidance-documents/considerations-use-histopathology-and-its-associated-methodologies-support-biomarker-qualification) (2020).
- 971 81. Ntzani, E. E. & Ioannidis, J. P. A. Predictive ability of DNA microarrays for cancer outcomes and  
972 correlates: an empirical assessment. *Lancet* **362**, 1439–1444 (2003).
- 973 82. Hemingway, H., Riley, R. D. & Altman, D. G. Ten steps towards improving prognosis research.  
974 *BMJ* **339**, b4184 (2009).
- 975 83. Warren, M. First analysis of ‘pre-registered’ studies shows sharp rise in null findings. *Nature* (2018)  
976 doi:10.1038/d41586-018-07118-1.
- 977 84. Grothey, A. *et al.* Duration of Adjuvant Chemotherapy for Stage III Colon Cancer. *New England*  
978 *Journal of Medicine* **378**, 1177–1188 (2018).
- 979 85. *Digestive System Tumours: WHO Classification of Tumours*. (World Health Organization, 2019).
- 980 86. Creed, J. H., Gerke, T. A. & Berglund, A. E. MatSurv: Survival analysis and visualization in  
981 MATLAB. *Journal of Open Source Software* **5**, 1830 (2020).
- 982 87. Schumacher, T. N. & Thommen, D. S. Tertiary lymphoid structures in cancer. *Science* **375**,  
983 eabf9419 (2022).
- 984
- 985

986 **Fig. 1 | Same-section immunofluorescence and H&E using the Orion™ Platform.**

987 **a**, Schematic of one-shot 16 to 20-channel multiplexed immunofluorescence imaging with the Orion™  
988 method followed by Hematoxylin and Eosin (H&E) staining of the same section using an automated  
989 slide stainer and scanning of the H&E-stained slide in transillumination (brightfield) mode. This method  
990 of discriminating the emission spectra of fluorophores is repeated using seven excitation lasers spaced  
991 across the spectrum (see **Extended Data Fig. 1a** and Methods section). Using polychroic mirrors and  
992 tunable optical filters, emission spectra are extracted to discriminate up to 20 channels including signal  
993 from fluorophore-labelled antibodies (15-19 in most experiments), the nuclear stain Hoechst 33342, and  
994 tissue intrinsic autofluorescence. **b**, Left panels: Orion multiplexed immunofluorescence image showing  
995 CD31,  $\alpha$ -SMA, Hoechst (DNA), and signal from the tissue autofluorescence channel (AF) from a  
996 colorectal cancer FFPE specimen (C04); this highlights an artery outside of the tumor region with red  
997 blood cells in the vessel lumen and elastic fibers in the internal and external elastic lamina of the vessel  
998 wall, numerous smaller vessels (arterioles), and stromal collagen fibers (inset displays arterioles). Right  
999 panels: images of the H&E staining from the same tissue section (histologic landmarks are indicated).  
1000 Scalebars 50  $\mu$ m. **c**, Orion multiplexed immunofluorescence image (showing CD45, pan-cytokeratin,  
1001 CD31, and  $\alpha$ -SMA) from a whole tissue FFPE section of a colorectal cancer (C04) and matched H&E  
1002 from the same section. Holes in the images are regions of tissue ('cores') removed in the construction of  
1003 TMAs. Scalebar 5 mm. **d**, Zoom-in views of the regions indicated by arrowheads in panel **c**; marker  
1004 combinations indicated. Scalebars 20  $\mu$ m. **e**, Intensities of fluorochromes (columns in heatmaps) in each  
1005 Orion channel (rows in heatmaps) prior to (top) and after (bottom) spectral extraction. The extraction  
1006 matrix was determined from control samples scanned using the same acquisition settings that were used  
1007 for the full panel. The control samples included: unstained lung tissue (for the autofluorescence  
1008 channel), tonsil tissue stained with Hoechst, and tonsil tissue stained in single-plex with ArgoFluor-

1009 conjugates used in the panel (for the biomarker channels). The values in each column were normalized  
1010 to the maximum value in the column.

1011

1012 **Fig. 2 | Qualifying 16-plex single-shot Orion antibody panel.**

1013 **a**, Panels of images from FFPE tonsil sections showing single-antibody immunohistochemistry (IHC)  
1014 for pan-cytokeratin, Ki-67, CD8a, CD163, and the matching channels extracted from 16-plex Orion  
1015 immunofluorescence (IF) images (H&E stain was performed on the same section as the Orion imaging).  
1016 Scalebars 50  $\mu\text{m}$ . **b**, Orion IF images and cyclic immunofluorescence (CyCIF) images from neighboring  
1017 sections of an FFPE colorectal adenocarcinoma; Scalebars 50  $\mu\text{m}$ . The CyCIF images collected using  
1018 2x2 binning while Orion images were obtained with no binning. **c**, Plots of the fraction of cells positive  
1019 for the indicated markers from whole slide Orion IF and CyCIF images acquired from neighboring  
1020 sections from 29 FFPE colorectal cancer specimens. Pearson correlation coefficients are indicated. **d**, t-  
1021 distributed stochastic neighbor embedding (t-SNE) plots of cells derived from CyCIF (left panels) and  
1022 Orion IF images (right panels) of a FFPE colorectal cancer specimen (C01) with the fluorescence  
1023 intensities of immune (CD45, pan-cytokeratin, CD8a,  $\alpha$ -SMA) markers overlaid on the plots as heat  
1024 maps. **e**, Orion images of FFPE tonsil tissue showing antibodies imaged across two cycles. 23 of 29  
1025 antibodies are displayed across four marker groups from four different regions of interest (labeled ROI  
1026 1-4). Markers from cycle 2 are underlined. The locations of the four ROIs in the whole slide image are  
1027 shown in **Extended Data Fig. 5a**). Scalebars 50  $\mu\text{m}$ .

1028

1029 **Fig. 3 | Combined H&E and Orion to identify cell/tissue types.**

1030 **a**, Representative images of Orion IF and same-section H&E from an area of normal colon (from  
1031 colorectal cancer resection specimen C02). Scalebars 50  $\mu\text{m}$ . **b**, Cell types not specifically identified by  
1032 markers in the Orion panel but readily recognized in H&E images including neutrophils, eosinophils,

1033 and cells undergoing mitoses (selected cells of each type denoted by arrowheads and dashed lines).  
1034 Scalebars 10  $\mu\text{m}$ . **c**, Spatial maps of the positions of cells (~15% of total cells) that were not detected by  
1035 the Orion IF panel in a colorectal cancer specimen overlaid onto the corresponding H&E image  
1036 (specimen: C01); red dots denote cells with identifiable nucleus but not subtyped using the antibody  
1037 panel. **d**, Upper panel: Spatial map of nine tissue classes determined from the H&E image using a  
1038 convolutional neural network (CNN) model for various cell types as indicated<sup>51</sup>. Lower panel: Percent  
1039 of total of “unidentifiable” (negative) cells assigned to a specific tissue class by the CNN applied to the  
1040 H&E image. **e**, Example same-section Orion IF and H&E images from areas enriched for ‘non-detected’  
1041 cells; examples include areas predicted to be rich in stroma and smooth muscle; Scalebars 100  $\mu\text{m}$ . **f**,  
1042 Orion IF and H&E images from colorectal cancer resection specimen C26, showing an area of serrated  
1043 adenoma with low pan-cytokeratin expression (markers as indicated). Whole slide image indicating the  
1044 location of this region is shown in **Extended Data Fig. 5f**. Scalebars 300  $\mu\text{m}$ .

1045

1046 **Fig. 4 | Recapitulating and extending the Immunoscore tissue immune test using Orion images.**

1047 **a**, Map of tumor center and invasive-margin compartments for specimen C04 overlaid on an H&E image  
1048 with the density of CD3<sup>+</sup> cells shown as a contour map (yellow) and the positions of CD8<sup>+</sup> T cells as  
1049 blue dots. The arrow indicates the zoom-in images shown below. Lower panel shows selected channels  
1050 from a portion of the Orion image for C04 spanning the invasive boundary (denoted by green shading).

1051 **b**, Flow chart for the calculation of Image Feature Model 1 (IFM1) that recapitulates key features of the  
1052 Immunoscore test. **c**, Upper panel: Box-and-whisker plots for progression-free survival (PFS) for 40  
1053 CRC patients based on actual IFM1 scores (midline = median, box limits = Q1 (25th percentile)/Q3  
1054 (75th percentile), whiskers = 1.5 inter-quartile range (IQR), dots = outliers (>1.5IQR) or scores stratified  
1055 into two classes as follows, low: score  $\leq 2$ , high: score = 3 or 4 (pairwise two-tailed t-test  $p = 0.002$ ).  
1056 Lower panel: Kaplan Meier plots computed using IFM1 binary classes (HR, hazards ratio; 95%

1057 confidence interval; logrank p-value). **d**, Flow chart for calculation of additional models that use the  
1058 underlying logic of Immunoscore but considering 13 markers. The image processing steps are the same  
1059 as in panel *a*. The rank positions of IFM1 and IFM2 are shown relative to all other 14,950 combinations  
1060 of parameters that were considered. **e**, (Left) Box-and-whisker plots for PFS for 40 CRC patients based  
1061 on IFM2 scores, with ranges as defined in *c*. (Right) Kaplan Meier plots for Cohort 1 computed using  
1062 IFM2 binary classes stratified into two classes as follows, low: score  $\leq 2$ , high: score = 3 or 4 (HR,  
1063 hazards ratio; 95% confidence interval; logrank p-value). **f**. Plot of leave-one-out cross-validation of  
1064 ranks from IFM1 and IFM2 (unadjusted  $p = 4.9 \times 10^{-26}$  and adjusted using the Benjamini-Hochberg  
1065 Procedure;  $p=7.3 \times 10^{-21}$ ); bootstrapping of hazard ratios is shown in **Extended Data Fig 6d**. Detailed  
1066 analysis was described in the methods section and pairwise two-tailed t-test were used unless otherwise  
1067 mentioned. **g**, Kaplan Meier plot for Cohort 2 computed using IFM2 binary classes stratified into two  
1068 classes as follows, low: score  $\leq 2$ , high: score = 3 or 4 (HR, hazards ratio; 95% confidence interval;  
1069 logrank p-value). **h**, Representative Orion IF images of cases with high IFM2 (score = 4 in specimen  
1070 C34) and low IFM2 (score = 0 in specimen C09). IF images show DNA, pan-cytokeratin,  $\alpha$ -SMA,  
1071 CD45, and PD-L1; Scalebars 100  $\mu\text{m}$ .

1072

1073 **Fig. 5 | Bottom-up development of a tumor-intrinsic image feature model.**

1074 **a**, Positions in specimen C39 of three selected topics identified using Latent Dirichlet Allocation (LDA).  
1075 Topic locations are overlaid on an H&E image; Scalebar 5 mm. **b**, Left: Markers making up selected  
1076 LDA topics as shown with size of the text proportional to the frequency of the marker but with colored  
1077 text scaled by 50% for clarity; Radar plot indicating the fraction of cells positive for each marker in  
1078 Topics 7, 8, and 11 (data for all others topics shown in **Extended Data Fig. 7**). **c**, Immunofluorescence  
1079 images showing expression of pan-cytokeratin,  $\alpha$ -SMA, CD20, and CD45 for the indicated LDA topics.  
1080 The position of each image frame is denoted by the yellow boxes in panel *a*. Scalebars 100  $\mu\text{m}$ . **d**,



1081 Pearson correlation plots of progression-free survival (PFS) and Fraction of Topic 7, 8 and 11 in 40  
1082 CRC patients. Topic 11 corresponded to TLS, whose presence is known to correlate with good  
1083 outcome<sup>87</sup>. **e**, Fraction of Topics 7, 8, and 11 in colorectal cancer specimens C1-C40. **f**, Box-and-  
1084 whisker plots showing fractions of Topic 7, 8, and 11 positive cells for indicated markers; midline =  
1085 median, box limits = Q1 (25th percentile)/Q3 (75th percentile), whiskers = 1.5 inter-quartile range  
1086 (IQR), dots = outliers (>1.5IQR)). Pairwise t-test p values indicated.

1087

1088 **Fig. 6 | LDA Topic 7 corresponds to aggressive tumor regions and is correlated with poor**  
1089 **outcomes.**

1090 **a&b**, Kaplan Meier plots of PFS based on the fraction of Topic 7 present in the tumor domain and  
1091 stratified as follows: high class: above median (50 percentile) of all cases, and low class: below median  
1092 (HR, hazards ratio; 95% confidence interval; logrank p-value) for **a**, 40 CRC Cohort 1 patients and **b**, 34  
1093 CRC Cohort 2 patients. **c**, Representative images of Topic 7 (left) and Topic 8 (right) extracted from all  
1094 specimens using a convolutional neural network (GoogLeNet) trained on LDA data. **d**, Spatial map of  
1095 LDA Topic 7 and H&E image from colorectal cancer sample C02. **e**, Plot of fraction of Topic 7 (IFM3)  
1096 versus IFM1 score for 40 CRC patients. **f&g**, Kaplan Meier plots stratified using IFM4 which was  
1097 binarized as follows: class 1: IFM1 high and Topic 7 (IFM3) low group; class 2: all other patients – i.e.,  
1098 either low IFM1 and/or high Topic 7 (IFM3) (HR, hazards ratio; 95% confidence interval; logrank p-  
1099 value), for **g**, Cohort 1(40 CRC patients) and **h**, Cohort 2 (34 CRC patients).

1100

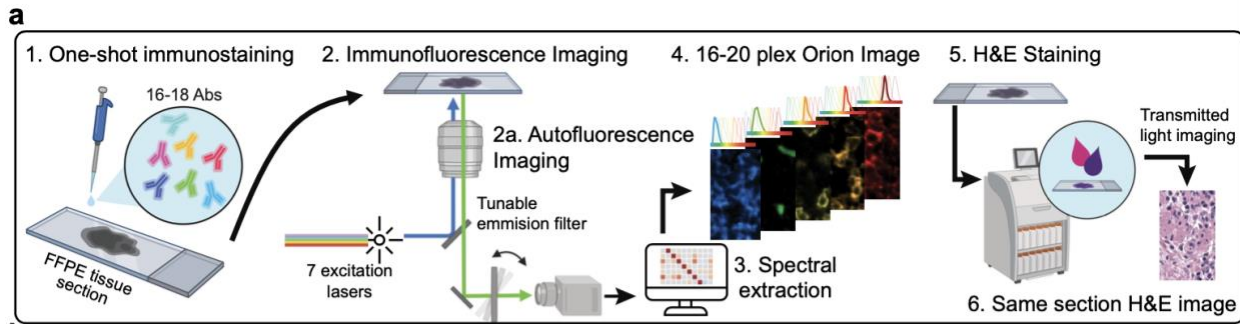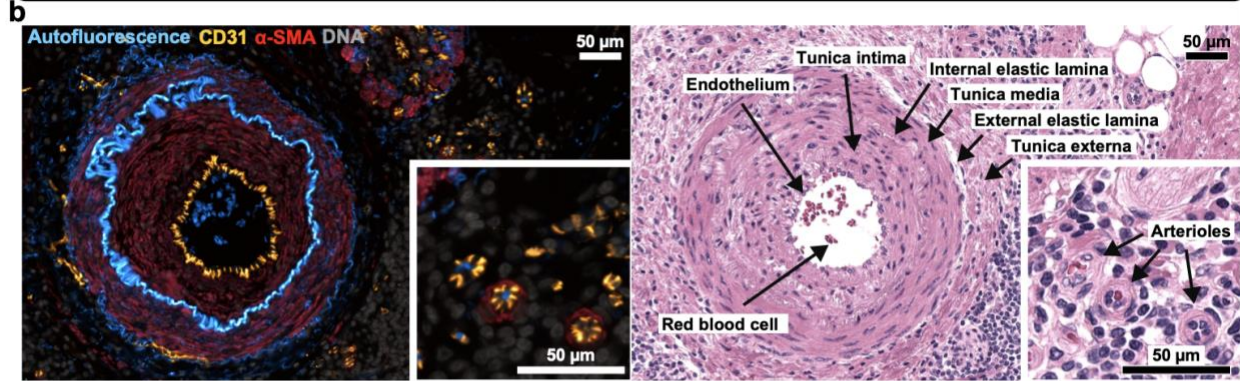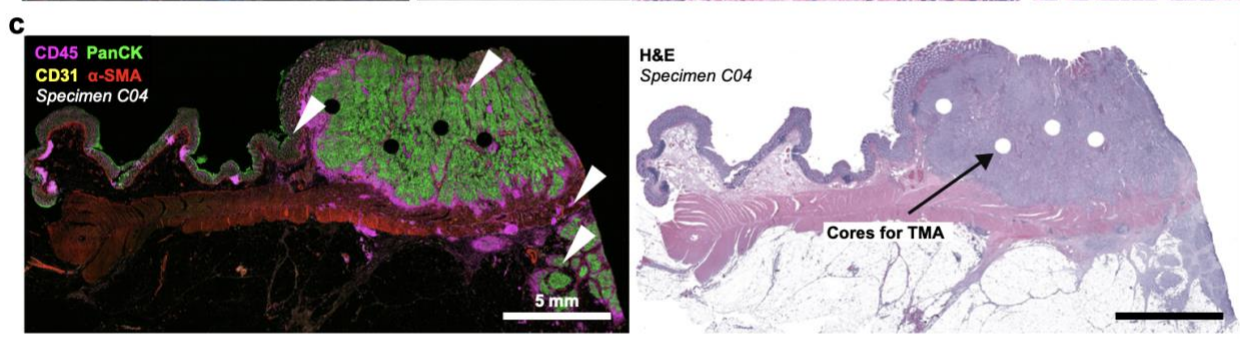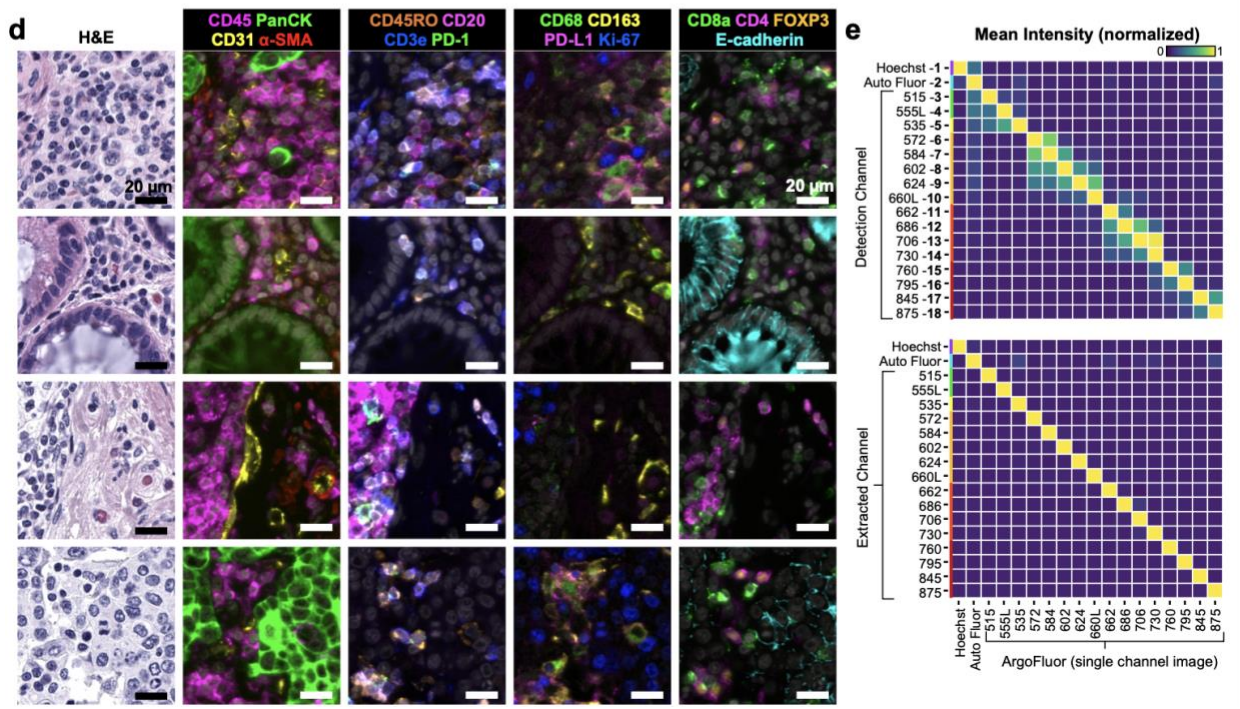

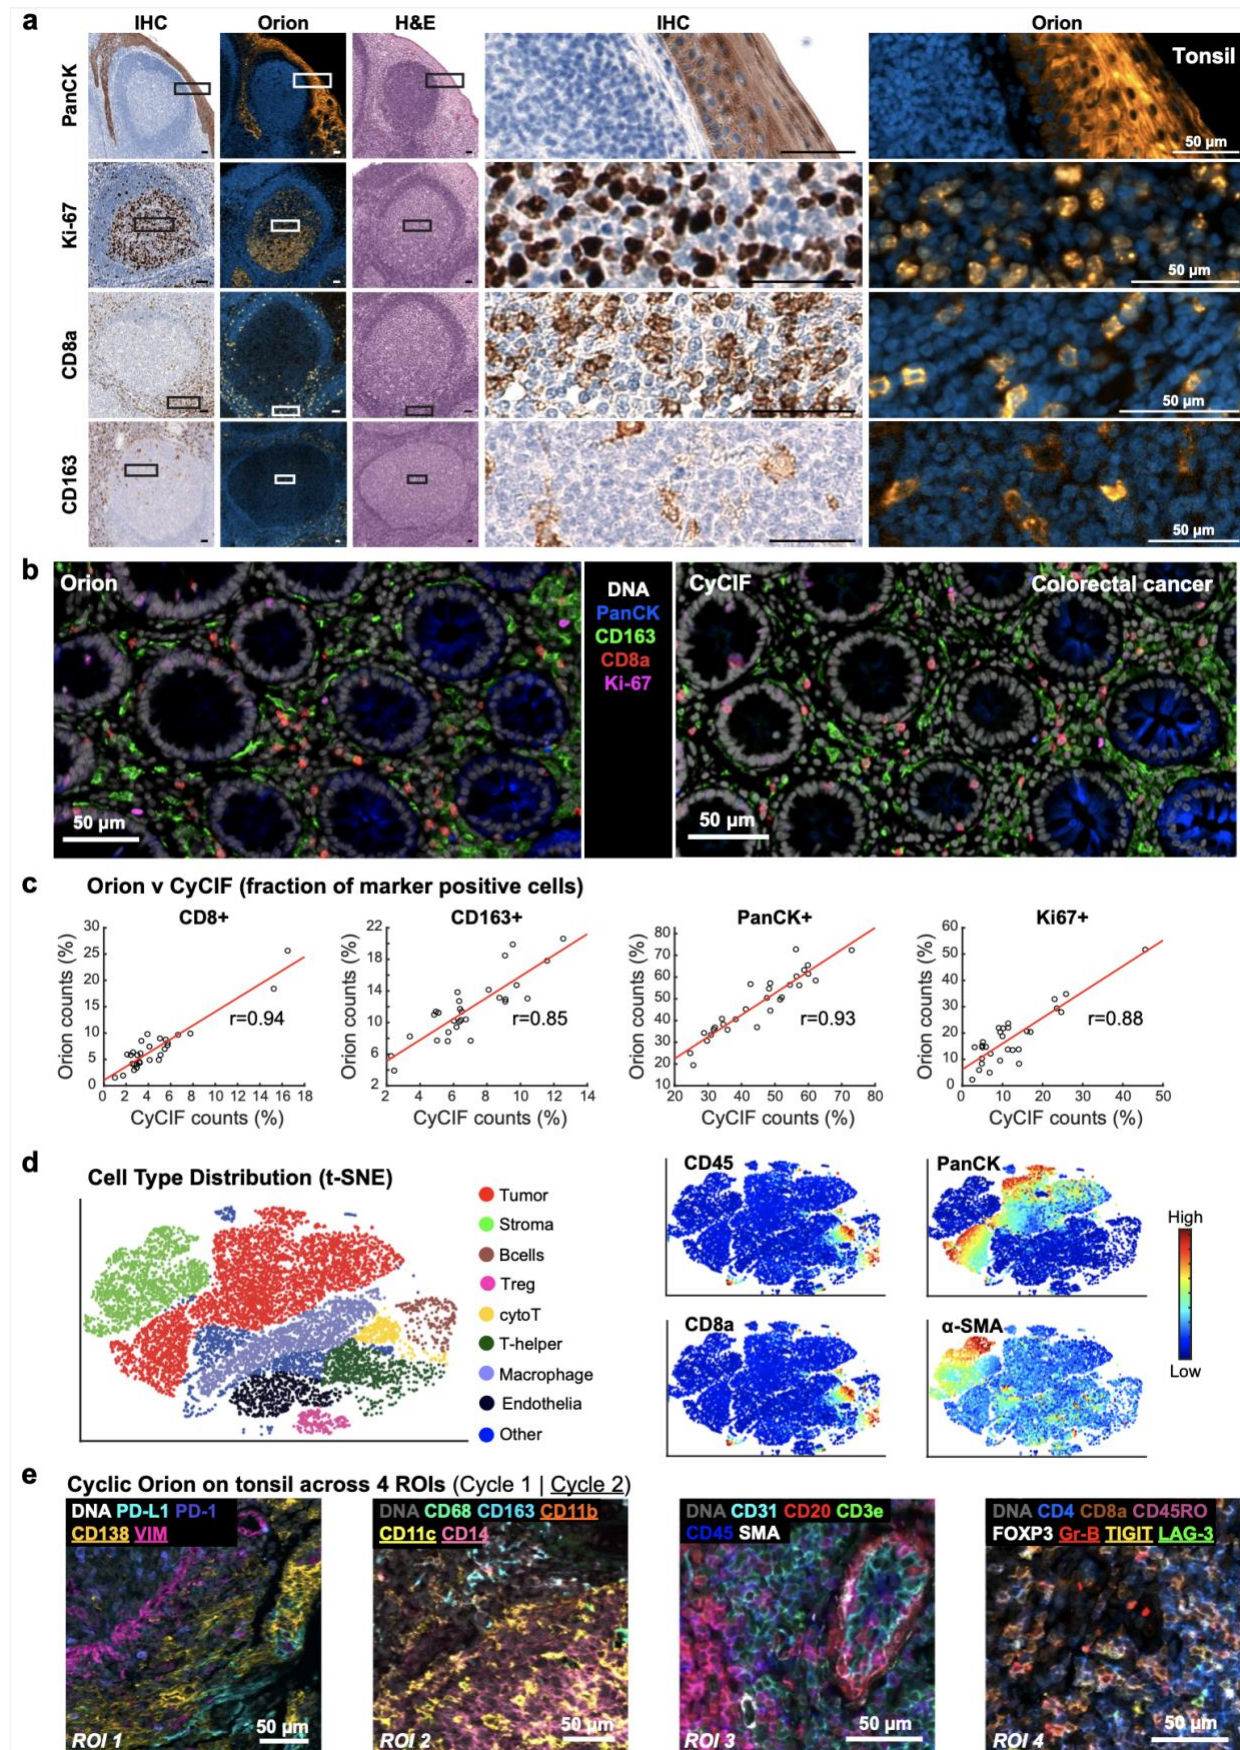

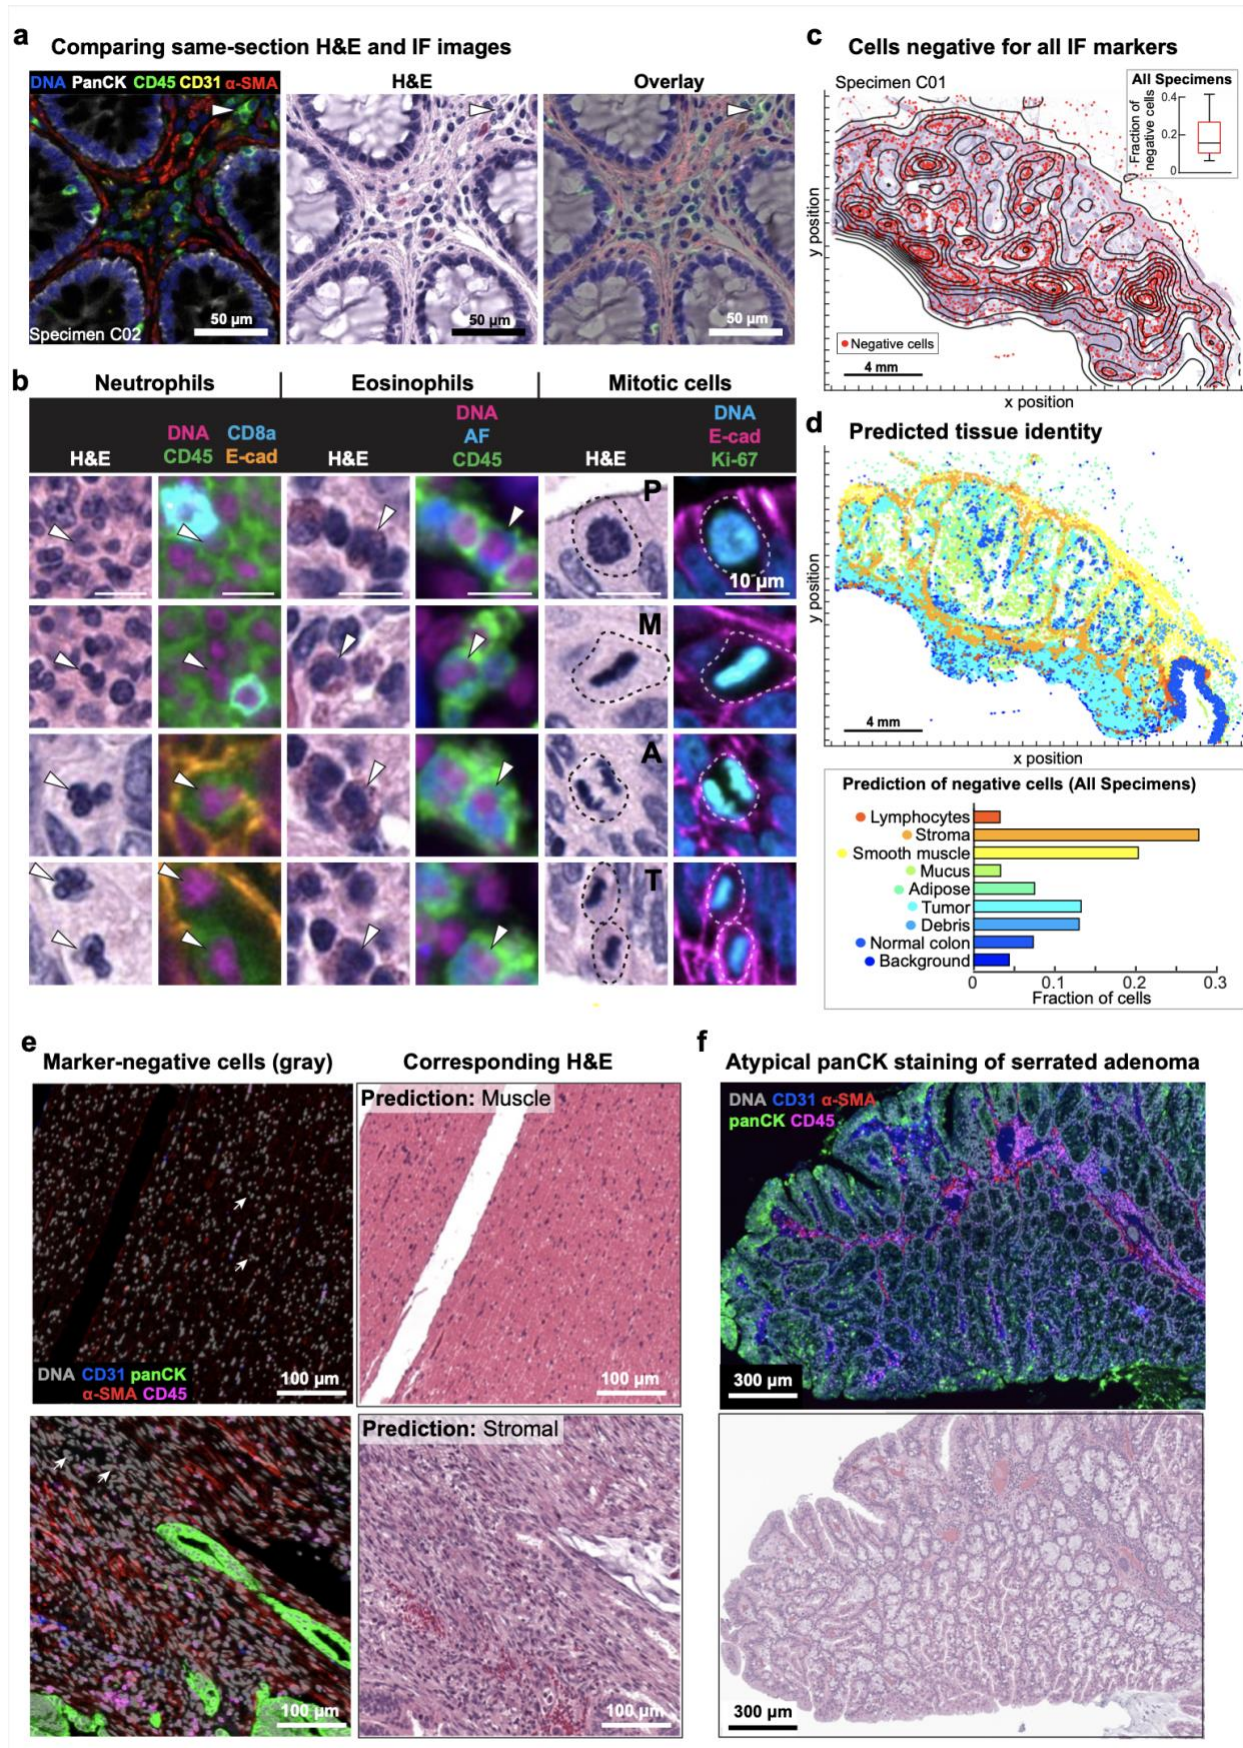

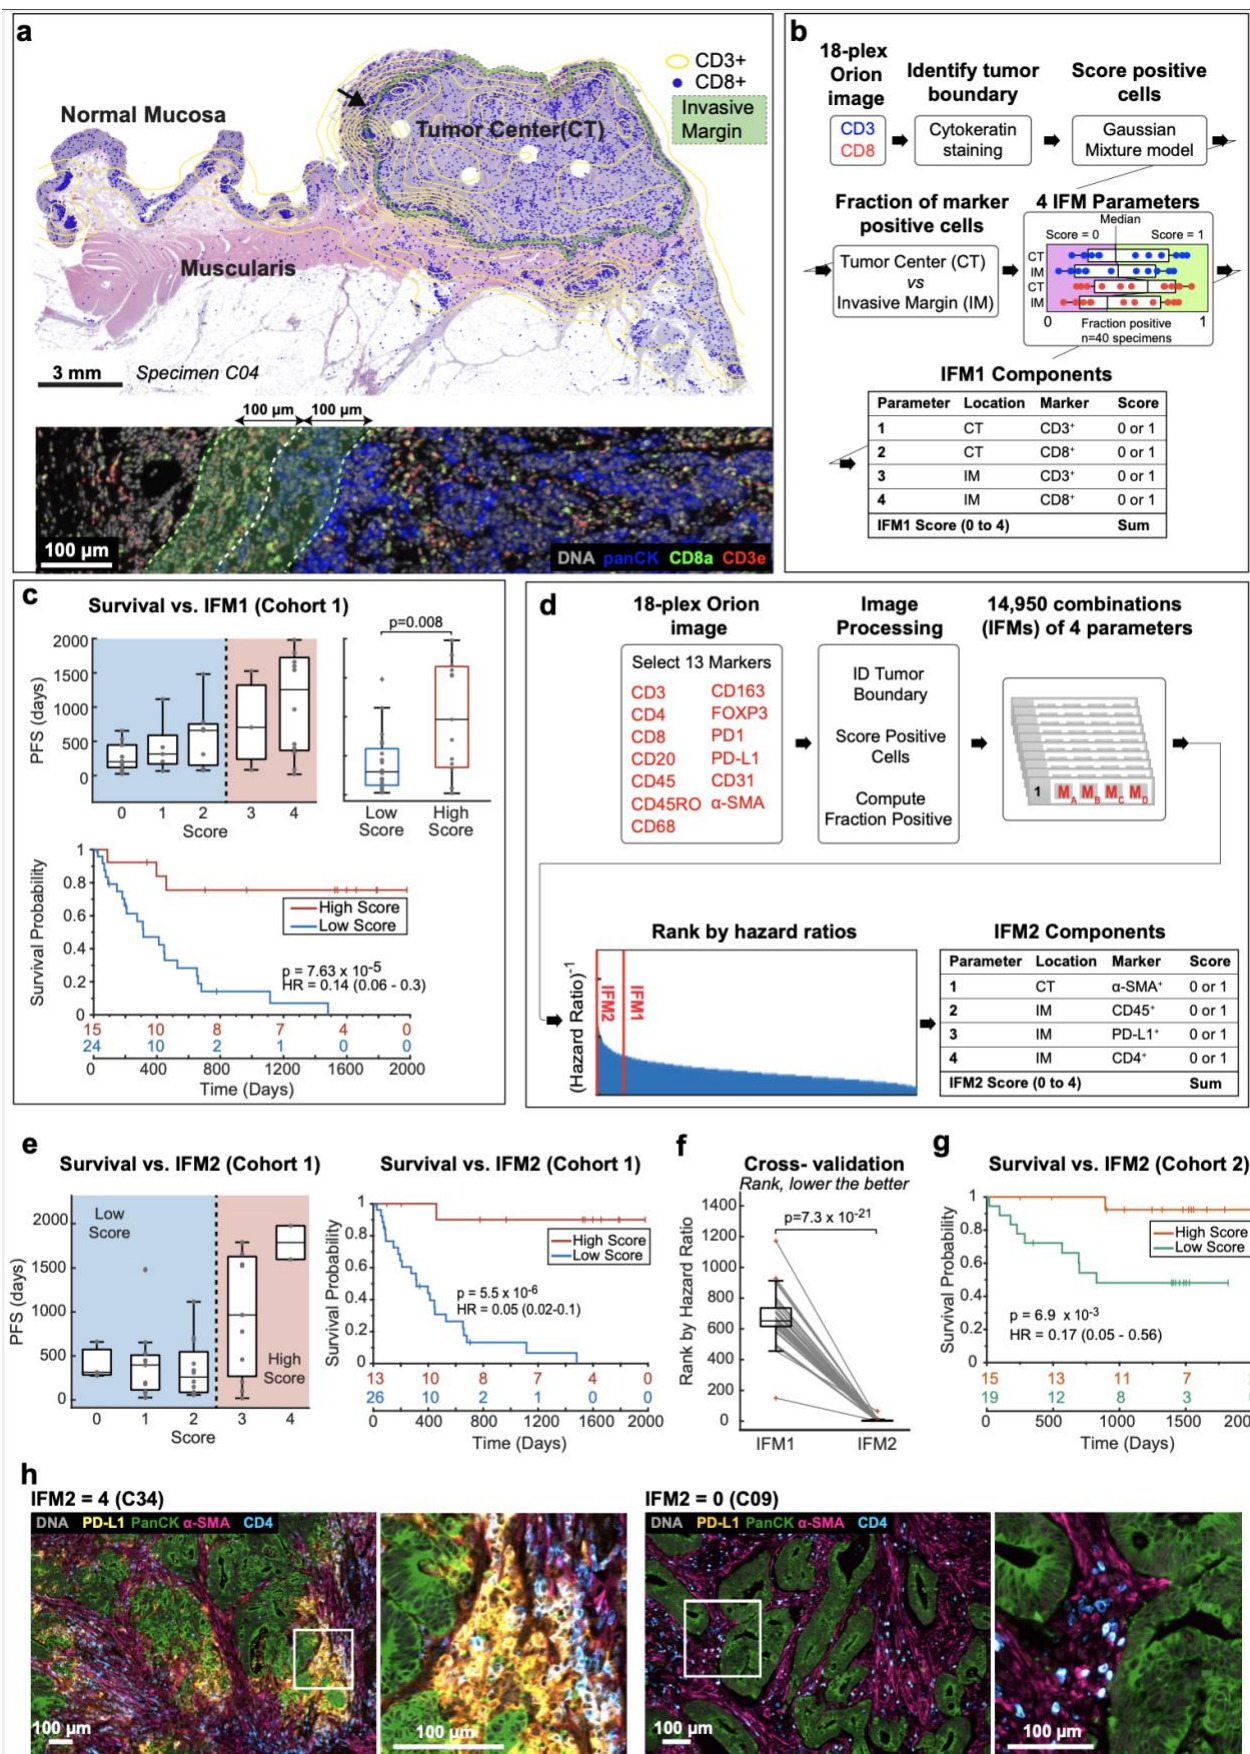

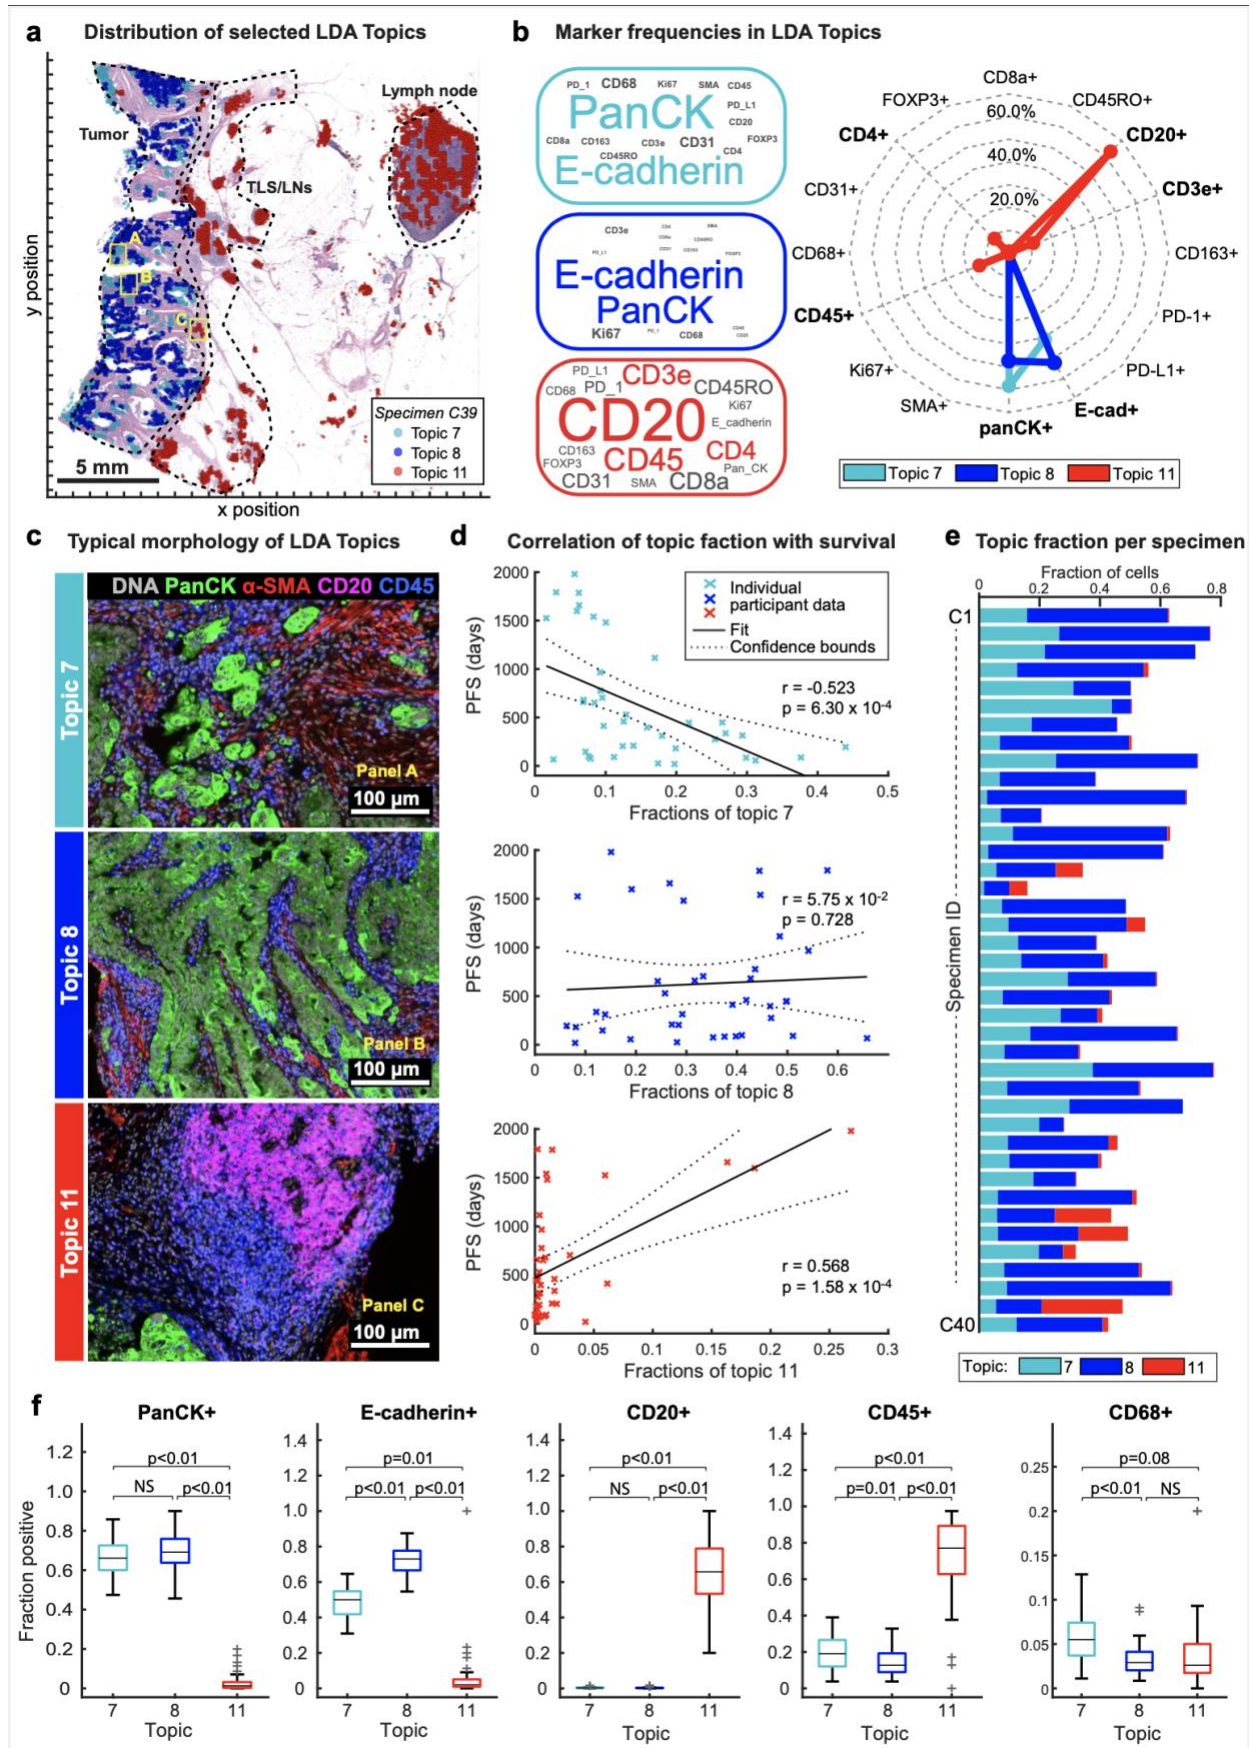

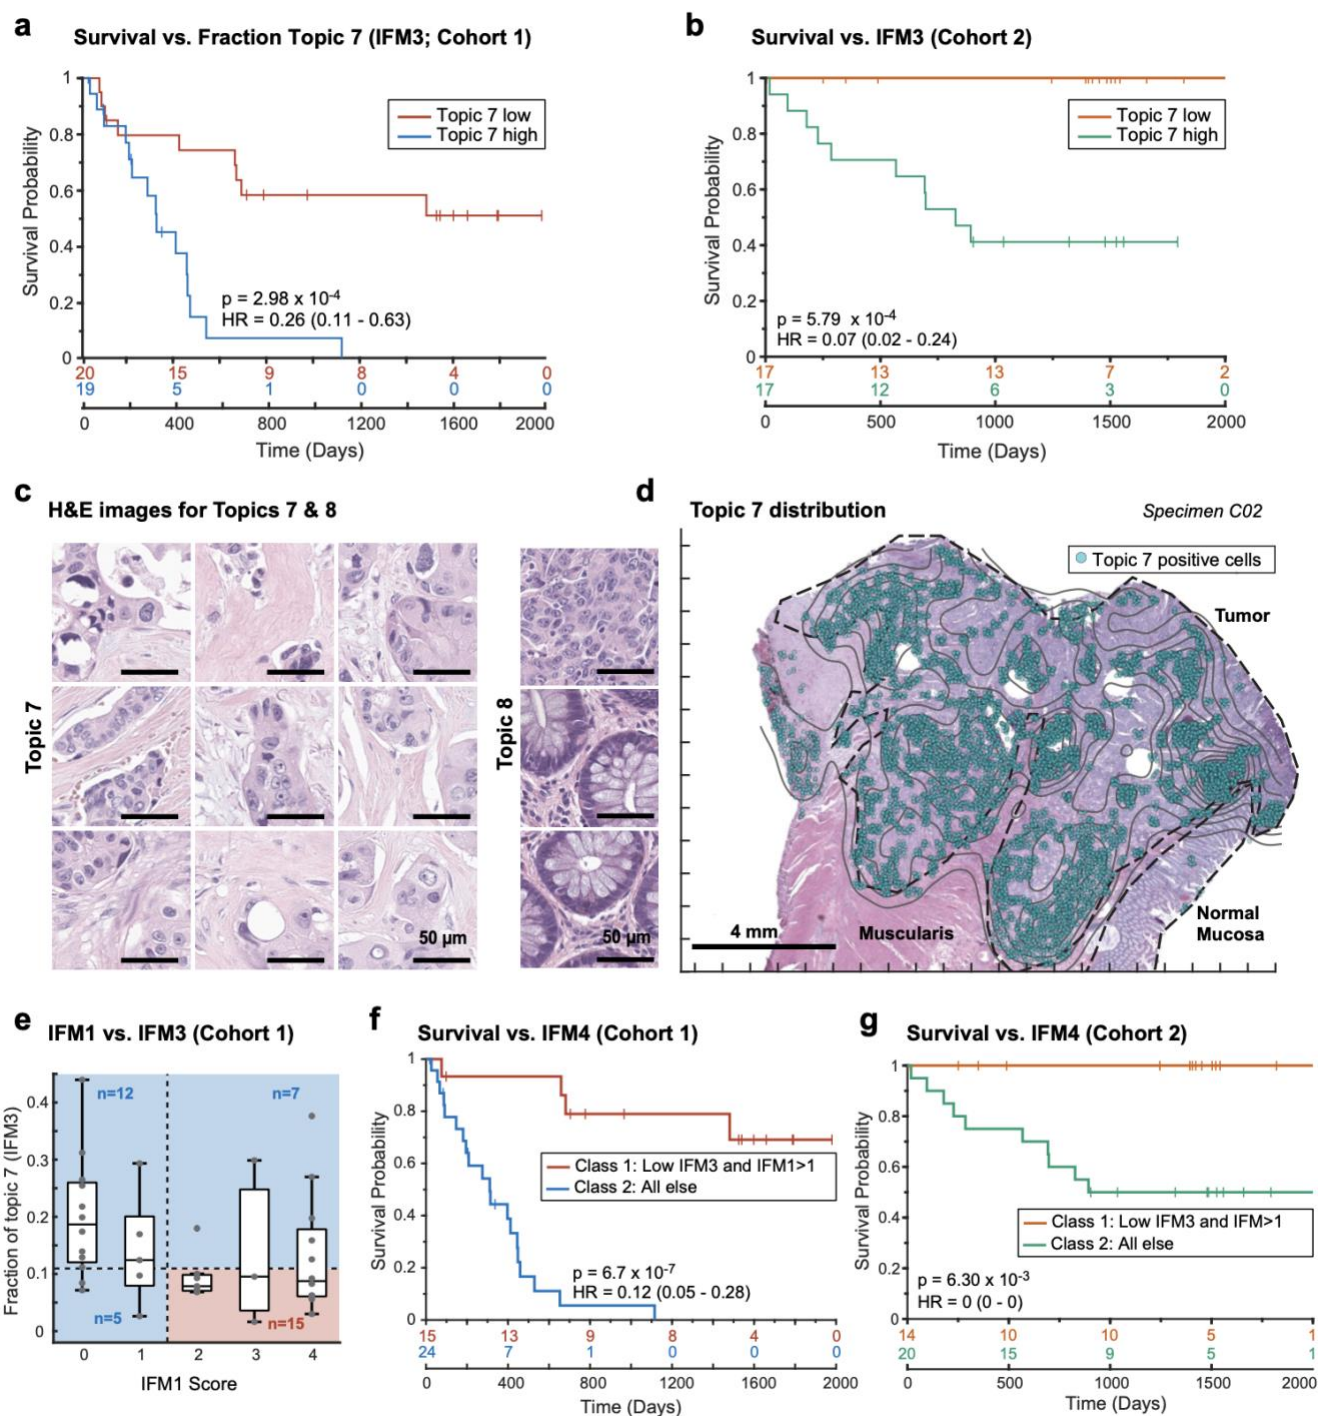

1092

1093 **Fig. 6 | LDA Topic 7 corresponds to aggressive tumor regions and is correlated with poor**  
 1094 **outcomes.**

1095 **a&b,** Kaplan Meier plots of PFS based on the fraction of Topic 7 present in the tumor domain and

1096 stratified as follows: high class: above median (50 percentile) of all cases, and low class: below median
